# Supplementary material
Source: publisher site journal article supplement (https://www.spandidos-publications.com/6036/downloadSupplementary)
Supplement: Supplementary file 1 [file downloadSupplementary]

## Sheet: Table SI
Table SI. Expression of CYTH4 in cell lines from CCLE.
DepMap ID	CYTH4 log2(TPM+1) Expression 22Q2 Public	Cell line name	Primary disease	Lineage	Leukemia subtype
ACH-001113	0.0285692	LC1SQSF	Lung Cancer	Lung	NA
ACH-001289	0	COGAR359	Rhabdoid	Soft Tissue	NA
ACH-001339	0.356144	COLO794	Skin Cancer	Skin	NA
ACH-001538	2.3978	KKU213	Bile Duct Cancer	Bile Duct	NA
ACH-000242	0.0840643	RT4	Bladder Cancer	Urinary Tract	NA
ACH-000708	0.0703893	SNU283	Colon/Colorectal Cancer	Colorectal	NA
ACH-000327	0.238787	NCIH1395	Lung Cancer	Lung	NA
ACH-000233	5.76261	DEL	Lymphoma	Lymphocyte	NA
ACH-000461	0.454176	SNU1196	Bile Duct Cancer	Bile Duct	NA
ACH-000705	0.0565835	LC1F	Lung Cancer	Lung	NA
ACH-001794	0.163499	93T449	Liposarcoma	Soft Tissue	NA
ACH-002023	0.62293	TGBC18TKB	Colon/Colorectal Cancer	Colorectal	NA
ACH-000528	0.0143553	ABC1	Lung Cancer	Lung	NA
ACH-001655	0.137504	SKN	Endometrial/Uterine Cancer	Uterus	NA
ACH-000167	1.52105	KE97	Myeloma	Plasma Cell	NA
ACH-000792	2.05311	BFTC909	Kidney Cancer	Kidney	NA
ACH-001098	0.176323	KCIMOH1	Pancreatic Cancer	Pancreas	NA
ACH-000570	0.464668	YKG1	Brain Cancer	Central Nervous System	NA
ACH-000351	0.687061	MKN1	Gastric Cancer	Gastric	NA
ACH-000769	0.0143553	LK2	Lung Cancer	Lung	NA
ACH-000154	0.31034	HS888T	Non-Cancerous	Fibroblast	NA
ACH-000828	0.250962	ZR7530	Breast Cancer	Breast	NA
ACH-000421	0.0976108	SW837	Colon/Colorectal Cancer	Colorectal	NA
ACH-000765	0.15056	WM983B	Skin Cancer	Skin	NA
ACH-001375	0.0565835	PACADD119	Pancreatic Cancer	Pancreas	NA
ACH-000008	0.0143553	A101D	Skin Cancer	Skin	NA
ACH-001814	0.0840643	OS252	Bone Cancer	Bone	NA
ACH-000800	0.0285692	NCIH446	Lung Cancer	Lung	NA
ACH-000606	0.62293	PECAPJ34CLONEC12	Head and Neck Cancer	Upper Aerodigestive	NA
ACH-000317	0.454176	TUHR14TKB	Kidney Cancer	Kidney	NA
ACH-000123	0.0143553	COV434	Ovarian Cancer	Ovary	NA
ACH-000723	0.475085	YD10B	Head and Neck Cancer	Upper Aerodigestive	NA
ACH-002066	0.536053	HSSCH2	Sarcoma	Central Nervous System	NA
ACH-001536	0	KKU100	Bile Duct Cancer	Bile Duct	NA
ACH-000313	0.400538	KMRC3	Kidney Cancer	Kidney	NA
ACH-002019	0.0976108	HOKUG	Cervical Cancer	Cervix	NA
ACH-000728	0.536053	KASUMI2	Leukemia	Blood	ALL
ACH-000700	0.124328	NCIH2882	Lung Cancer	Lung	NA
ACH-000823	0.137504	KYSE140	Esophageal Cancer	Esophagus	NA
ACH-000678	0.0143553	MKN7	Gastric Cancer	Gastric	NA
ACH-000006	3.16027	MONOMAC6	Leukemia	Blood	AML
ACH-002029	0.356144	SAS	Head and Neck Cancer	Upper Aerodigestive	NA
ACH-001377	0.0565835	PACADD137	Pancreatic Cancer	Pancreas	NA
ACH-000754	1.16993	L428	Lymphoma	Lymphocyte	NA
ACH-000465	0.0840643	SKMEL1	Skin Cancer	Skin	NA
ACH-000138	2.0635	CFPAC1	Pancreatic Cancer	Pancreas	NA
ACH-001864	0.0840643	YSCCC	Bile Duct Cancer	Bile Duct	NA
ACH-000383	0.903038	OE33	Esophageal Cancer	Esophagus	NA
ACH-001547	0.250962	LO68	Lung Cancer	Lung	NA
ACH-000917	1.4957	TE4	Esophageal Cancer	Esophagus	NA
ACH-002471	0.0285692	PSS008	Bone Cancer	Bone	NA
ACH-000984	0.0285692	HEC6	Endometrial/Uterine Cancer	Uterus	NA
ACH-001409	0.0143553	UMUC16	Bladder Cancer	Urinary Tract	NA
ACH-001707	4.37573	WAOSEL	Leukemia	Blood	AML
ACH-000117	0.0703893	EFM192A	Breast Cancer	Breast	NA
ACH-000999	0	SNU1040	Colon/Colorectal Cancer	Colorectal	NA
ACH-000633	0.0840643	FU97	Gastric Cancer	Gastric	NA
ACH-000520	0.111031	59M	Ovarian Cancer	Ovary	NA
ACH-000176	0.15056	LOUNH91	Lung Cancer	Lung	NA
ACH-000017	0.298658	SKBR3	Breast Cancer	Breast	NA
ACH-000020	2.72247	MHHCALL2	Leukemia	Blood	ALL
ACH-001385	0	RPMI2650	Head and Neck Cancer	Upper Aerodigestive	NA
ACH-000587	1.30451	NCIH1975	Lung Cancer	Lung	NA
ACH-000785	0.422233	NCIH2126	Lung Cancer	Lung	NA
ACH-000554	0.0285692	UACC893	Breast Cancer	Breast	NA
ACH-001398	0.400538	SW156	Kidney Cancer	Kidney	NA
ACH-001991	0	NZOV9	Ovarian Cancer	Ovary	NA
ACH-001332	0	BICR78	Head and Neck Cancer	Upper Aerodigestive	NA
ACH-000585	1.98914	EPLC272H	Lung Cancer	Lung	NA
ACH-000550	0.782409	IGR39	Skin Cancer	Skin	NA
ACH-000627	2.06005	LCLC103H	Lung Cancer	Lung	NA
ACH-000704	0	OAW42	Ovarian Cancer	Ovary	NA
ACH-000276	0.0565835	HCC38	Breast Cancer	Breast	NA
ACH-000075	3.68257	U87MG	Brain Cancer	Central Nervous System	NA
ACH-000818	0.495695	BT483	Breast Cancer	Breast	NA
ACH-001616	0	OCILY18	Lymphoma	Lymphocyte	NA
ACH-000625	0.948601	HEP3B217	Liver Cancer	Liver	NA
ACH-000941	0.0565835	HEC1B	Endometrial/Uterine Cancer	Uterus	NA
ACH-000392	0.286881	CALU3	Lung Cancer	Lung	NA
ACH-000269	0.970854	AM38	Brain Cancer	Central Nervous System	NA
ACH-001670	0.137504	TASK1	Brain Cancer	Peripheral Nervous System	NA
ACH-000856	0	CAL51	Breast Cancer	Breast	NA
ACH-002687	0	WM3772F	Eye Cancer	Eye	NA
ACH-001119	5.63865	MAC2A	Lymphoma	Lymphocyte	NA
ACH-000376	0.85599	SF295	Brain Cancer	Central Nervous System	NA
ACH-000685	0.0426443	L33	Pancreatic Cancer	Pancreas	NA
ACH-000729	0.137504	NCIH1963	Lung Cancer	Lung	NA
ACH-001034	0	CHLA9	Bone Cancer	Bone	NA
ACH-001283	0.0143553	TC106	Bone Cancer	Bone	NA
ACH-000880	0.111031	AGS	Gastric Cancer	Gastric	NA
ACH-000035	0.0143553	NCIH1650	Lung Cancer	Lung	NA
ACH-001200	0	STM9101	Rhabdoid	Soft Tissue	NA
ACH-000194	0.0143553	HS934T	Non-Cancerous	Fibroblast	NA
ACH-000322	0.0143553	HT144	Skin Cancer	Skin	NA
ACH-000552	0.0143553	HT29	Colon/Colorectal Cancer	Colorectal	NA
ACH-002508	0.83996	WM3211	Skin Cancer	Skin	NA
ACH-000222	0.298658	ASPC1	Pancreatic Cancer	Pancreas	NA
ACH-000260	0.0976108	SKNAS	Neuroblastoma	Peripheral Nervous System	NA
ACH-001652	0.298658	SKGII	Endometrial/Uterine Cancer	Uterus	NA
ACH-000608	0.594549	COV644	Ovarian Cancer	Ovary	NA
ACH-000501	0.201634	LS123	Colon/Colorectal Cancer	Colorectal	NA
ACH-000612	6.38146	HUT102	Lymphoma	Lymphocyte	NA
ACH-001184	0	SCMCRM2	Sarcoma	Soft Tissue	NA
ACH-001688	0.545968	UMRC7	Kidney Cancer	Kidney	NA
ACH-001838	0.286881	ICC12	Bile Duct Cancer	Bile Duct	NA
ACH-000638	0.201634	NCIH441	Lung Cancer	Lung	NA
ACH-001846	0.176323	ICC6	Bile Duct Cancer	Bile Duct	NA
ACH-000798	0.0703893	CL40	Colon/Colorectal Cancer	Colorectal	NA
ACH-001321	0.389567	TT	Thyroid Cancer	Thyroid	NA
ACH-000894	0.0840643	NCIH1869	Lung Cancer	Lung	NA
ACH-001559	0.0426443	MERO82	Lung Cancer	Lung	NA
ACH-000344	0.0143553	SNU668	Gastric Cancer	Gastric	NA
ACH-000223	0.411426	HCC1937	Breast Cancer	Breast	NA
ACH-000031	2.18903	PANC0213	Pancreatic Cancer	Pancreas	NA
ACH-000034	5.54628	PLB985	Leukemia	Blood	AML
ACH-001861	0.807355	TGBC1TKB	Gallbladder Cancer	Bile Duct	NA
ACH-000772	0.226509	TE441T	Sarcoma	Soft Tissue	NA
ACH-000946	1.02857	HEC265	Endometrial/Uterine Cancer	Uterus	NA
ACH-000596	0.422233	LCLC97TM1	Lung Cancer	Lung	NA
ACH-000632	1.08406	HS944T	Skin Cancer	Skin	NA
ACH-000978	0.0703893	EN	Endometrial/Uterine Cancer	Uterus	NA
ACH-000332	2.53107	YAPC	Pancreatic Cancer	Pancreas	NA
ACH-001841	0.238787	ICC15	Bile Duct Cancer	Bile Duct	NA
ACH-000179	0.0426443	NCIH1618	Lung Cancer	Lung	NA
ACH-000887	0.321928	SF172	Brain Cancer	Central Nervous System	NA
ACH-000368	0.15056	SNU1105	Brain Cancer	Central Nervous System	NA
ACH-000240	0.0840643	HS600T	Non-Cancerous	Fibroblast	NA
ACH-000578	0.344828	HCC1171	Lung Cancer	Lung	NA
ACH-001611	0.555816	NP8	Brain Cancer	Central Nervous System	NA
ACH-000135	0.0285692	HS940T	Non-Cancerous	Fibroblast	NA
ACH-000406	2.73552	U937	Leukemia	Blood	AML
ACH-001541	0	KMS28PE	Myeloma	Plasma Cell	NA
ACH-000998	0.0565835	CW2	Colon/Colorectal Cancer	Colorectal	NA
ACH-000441	0.0840643	SH4	Skin Cancer	Skin	NA
ACH-000960	3.12763	REH	Leukemia	Blood	ALL
ACH-000098	2.58015	GAMG	Brain Cancer	Central Nervous System	NA
ACH-001651	0.238787	SKGI	Endometrial/Uterine Cancer	Uterus	NA
ACH-001456	0	C125PM	Colon/Colorectal Cancer	Colorectal	NA
ACH-001336	0.367371	CASKI	Cervical Cancer	Cervix	NA
ACH-000284	0.238787	HS840T	Non-Cancerous	Fibroblast	NA
ACH-000971	1.11103	HCT116	Colon/Colorectal Cancer	Colorectal	NA
ACH-001454	0.0285692	C10	Colon/Colorectal Cancer	Colorectal	NA
ACH-000926	0.0426443	HT55	Colon/Colorectal Cancer	Colorectal	NA
ACH-000033	0.0285692	NCIH1819	Lung Cancer	Lung	NA
ACH-000576	1.16993	KMS27	Myeloma	Plasma Cell	NA
ACH-000019	0.201634	MCF7	Breast Cancer	Breast	NA
ACH-001577	4.07125	MUTZ8	Leukemia	Blood	AML
ACH-000330	0.189034	EFM19	Breast Cancer	Breast	NA
ACH-000848	0.111031	JHH7	Liver Cancer	Liver	NA
ACH-000481	0.0426443	NCIH2170	Lung Cancer	Lung	NA
ACH-001517	0	HEC1	Endometrial/Uterine Cancer	Uterus	NA
ACH-000338	6.42173	SR786	Lymphoma	Lymphocyte	NA
ACH-001959	0	CCLP1	Bile Duct Cancer	Bile Duct	NA
ACH-001414	0	UMUC6	Bladder Cancer	Urinary Tract	NA
ACH-000871	0.0143553	NCIH510	Lung Cancer	Lung	NA
ACH-001403	0.163499	TO14	Ovarian Cancer	Ovary	NA
ACH-000805	0.189034	COLO679	Skin Cancer	Skin	NA
ACH-001142	0.367371	NHAHTDD	Non-Cancerous	Central Nervous System	NA
ACH-001554	0.0143553	MEL202	Eye Cancer	Eye	NA
ACH-000847	0.0703893	HGC27	Gastric Cancer	Gastric	NA
ACH-001207	0.189034	TIG3TD	Non-Cancerous	Fibroblast	NA
ACH-000832	0.0976108	CAL27	Head and Neck Cancer	Upper Aerodigestive	NA
ACH-000428	0.863938	UO31	Kidney Cancer	Kidney	NA
ACH-001382	0.536053	PACADD188	Pancreatic Cancer	Pancreas	NA
ACH-001302	0	COGN305	Neuroblastoma	Peripheral Nervous System	NA
ACH-000690	0.0285692	HCC2814	Lung Cancer	Lung	NA
ACH-001134	1.71809	MYLA	Lymphoma	Lymphocyte	NA
ACH-000914	0.495695	HT	Lymphoma	Lymphocyte	NA
ACH-000858	0.526069	KNS62	Lung Cancer	Lung	NA
ACH-001421	0.137504	WERIRB1	Eye Cancer	Eye	NA
ACH-000544	0.0143553	OE21	Esophageal Cancer	Esophagus	NA
ACH-000725	0.0143553	HCC202	Breast Cancer	Breast	NA
ACH-000566	0.0426443	SW1710	Bladder Cancer	Urinary Tract	NA
ACH-000760	0	LNZ308	Brain Cancer	Central Nervous System	NA
ACH-001745	0	RHJT	Sarcoma	Soft Tissue	NA
ACH-000787	1.1177	LXF289	Lung Cancer	Lung	NA
ACH-000749	0	DMS273	Lung Cancer	Lung	NA
ACH-001328	0.0426443	A431	Skin Cancer	Skin	NA
ACH-001068	3.58256	FEPD	Lymphoma	Lymphocyte	NA
ACH-000358	0.0703893	NCIH69	Lung Cancer	Lung	NA
ACH-001654	1.1635	SKGT4	Esophageal Cancer	Esophagus	NA
ACH-001521	0.0840643	HKA1	Skin Cancer	Skin	NA
ACH-000209	0.765535	SNU1079	Bile Duct Cancer	Bile Duct	NA
ACH-001520	1.59932	HG3	Leukemia	Blood	CLL
ACH-000213	0.0143553	HUPT4	Pancreatic Cancer	Pancreas	NA
ACH-001610	0.0976108	NP5	Brain Cancer	Central Nervous System	NA
ACH-001408	0.176323	UMUC14	Bladder Cancer	Urinary Tract	NA
ACH-000991	0.124328	SNU81	Colon/Colorectal Cancer	Colorectal	NA
ACH-001412	0.137504	UMUC10	Bladder Cancer	Urinary Tract	NA
ACH-000331	0.275007	ISTMES2	Lung Cancer	Lung	NA
ACH-001407	0.0565835	UMUC13	Bladder Cancer	Urinary Tract	NA
ACH-000580	0	C32	Skin Cancer	Skin	NA
ACH-000594	0.111031	DMS153	Lung Cancer	Lung	NA
ACH-000684	0.895303	KMRC1	Kidney Cancer	Kidney	NA
ACH-000742	0.0976108	DM3	Non-Cancerous	Fibroblast	NA
ACH-000868	0.189034	HCC1195	Lung Cancer	Lung	NA
ACH-000732	0.432959	PECAPJ41CLONED2	Head and Neck Cancer	Upper Aerodigestive	NA
ACH-000429	1.26903	A704	Kidney Cancer	Kidney	NA
ACH-000310	0.0703893	IMR32	Neuroblastoma	Peripheral Nervous System	NA
ACH-002475	0	HAP1	Leukemia	Blood	CML
ACH-000643	0.15056	HDQP1	Breast Cancer	Breast	NA
ACH-000234	0.790772	CAKI2	Kidney Cancer	Kidney	NA
ACH-001498	2.59455	FARAGE	Lymphoma	Lymphocyte	NA
ACH-000896	0.0703893	647V	Bladder Cancer	Urinary Tract	NA
ACH-000203	0.0285692	NH6	Neuroblastoma	Peripheral Nervous System	NA
ACH-001607	1.852	NOZ	Gallbladder Cancer	Bile Duct	NA
ACH-001441	0	921	Eye Cancer	Eye	NA
ACH-000112	2.9222	SIGM5	Leukemia	Blood	AML
ACH-000186	0.704872	NCIH2444	Lung Cancer	Lung	NA
ACH-000677	0.214125	SW1573	Lung Cancer	Lung	NA
ACH-000055	0.0426443	D283MED	Brain Cancer	Central Nervous System	NA
ACH-000485	0.0703893	GSU	Gastric Cancer	Gastric	NA
ACH-000672	0.189034	IALM	Lung Cancer	Lung	NA
ACH-000287	1.54102	NUDUL1	Lymphoma	Lymphocyte	NA
ACH-000784	0.344828	KYSE70	Esophageal Cancer	Esophagus	NA
ACH-000530	0	DMS114	Lung Cancer	Lung	NA
ACH-002024	0.0143553	ECC4	Colon/Colorectal Cancer	Colorectal	NA
ACH-000380	3.39917	KMS12BM	Myeloma	Plasma Cell	NA
ACH-001737	3.52607	CTV1DM	Leukemia	Blood	ALL
ACH-001400	0.124328	SW954	Cervical Cancer	Cervix	NA
ACH-001054	0	D458	Brain Cancer	Central Nervous System	NA
ACH-000009	0.0143553	C2BBE1	Colon/Colorectal Cancer	Colorectal	NA
ACH-000491	0.0285692	NCIH716	Colon/Colorectal Cancer	Colorectal	NA
ACH-001703	4.95699	VAL	Lymphoma	Lymphocyte	NA
ACH-000002	2.79909	HL60	Leukemia	Blood	AML
ACH-001568	0.0143553	MM386	Skin Cancer	Skin	NA
ACH-000993	0.0703893	JHUEM7	Endometrial/Uterine Cancer	Uterus	NA
ACH-002680	0.378512	170MGBA	Brain Cancer	Central Nervous System	NA
ACH-000877	3.2555	EB1	Lymphoma	Lymphocyte	NA
ACH-000711	0.0143553	JIMT1	Breast Cancer	Breast	NA
ACH-001515	0	HCS2	Cervical Cancer	Cervix	NA
ACH-002847	0.201634	YUHOIN0650	Unknown	Unknown	NA
ACH-000702	2.54102	L1236	Lymphoma	Lymphocyte	NA
ACH-001020	0	BT16	Rhabdoid	Soft Tissue	NA
ACH-000600	1.21412	SLR26	Kidney Cancer	Kidney	NA
ACH-000354	0.565597	CAPAN1	Pancreatic Cancer	Pancreas	NA
ACH-000012	0.378512	HCC827	Lung Cancer	Lung	NA
ACH-000689	0.516015	RH18	Sarcoma	Soft Tissue	NA
ACH-000459	0.163499	TUHR10TKB	Kidney Cancer	Kidney	NA
ACH-001413	1.21412	UMUC11	Bladder Cancer	Urinary Tract	NA
ACH-000686	0.111031	SNU878	Liver Cancer	Liver	NA
ACH-000342	0.214125	CL14	Colon/Colorectal Cancer	Colorectal	NA
ACH-000208	0.321928	U178	Brain Cancer	Central Nervous System	NA
ACH-000360	0.0565835	NCIH508	Colon/Colorectal Cancer	Colorectal	NA
ACH-000249	0.111031	CL11	Colon/Colorectal Cancer	Colorectal	NA
ACH-001368	0.0143553	OACM51	Esophageal Cancer	Esophagus	NA
ACH-000231	0.0976108	KALS1	Brain Cancer	Central Nervous System	NA
ACH-000945	3.6241	NCIH650	Lung Cancer	Lung	NA
ACH-000662	1.50589	CORL23	Lung Cancer	Lung	NA
ACH-002458	0.0426443	HT144SKINFV1	Skin Cancer	Skin	NA
ACH-001378	0.163499	PACADD159	Pancreatic Cancer	Pancreas	NA
ACH-001029	0	CHLA10	Bone Cancer	Bone	NA
ACH-000248	0.0703893	AU565	Breast Cancer	Breast	NA
ACH-000943	0.0703893	RKO	Colon/Colorectal Cancer	Colorectal	NA
ACH-000751	0.0426443	OCIM1	Leukemia	Blood	AML
ACH-001696	0.124328	UPCISCC111	Head and Neck Cancer	Upper Aerodigestive	NA
ACH-001016	0.15056	BECKER	Brain Cancer	Central Nervous System	NA
ACH-000282	0.298658	NCIH1755	Lung Cancer	Lung	NA
ACH-000261	0.176323	RERFLCAI	Lung Cancer	Lung	NA
ACH-000164	1.23266	PANC1	Pancreatic Cancer	Pancreas	NA
ACH-001793	2.7845	LPS27	Liposarcoma	Soft Tissue	NA
ACH-000262	0.790772	UOK101	Kidney Cancer	Kidney	NA
ACH-000158	5.66135	OCILY3	Lymphoma	Lymphocyte	NA
ACH-000773	6.4363	KIJK	Lymphoma	Lymphocyte	NA
ACH-000722	0	SNUC1	Colon/Colorectal Cancer	Colorectal	NA
ACH-000857	0.201634	CAL851	Breast Cancer	Breast	NA
ACH-001129	4.96532	MONOMAC1	Leukemia	Blood	AML
ACH-001619	0.659925	OCUG1	Gallbladder Cancer	Bile Duct	NA
ACH-000184	0.0143553	HS343T	Non-Cancerous	Fibroblast	NA
ACH-000329	0.163499	CCFSTTG1	Brain Cancer	Central Nervous System	NA
ACH-001569	0.0703893	MM415	Skin Cancer	Skin	NA
ACH-000814	0.214125	HS939T	Skin Cancer	Skin	NA
ACH-001701	0.0703893	UPCISCC200	Head and Neck Cancer	Upper Aerodigestive	NA
ACH-000197	0.0285692	TALL1	Leukemia	Blood	ALL
ACH-000545	0.0285692	VMCUB1	Bladder Cancer	Urinary Tract	NA
ACH-000949	0.111031	TGBC11TKB	Gastric Cancer	Gastric	NA
ACH-000124	3.61471	OCILY19	Lymphoma	Lymphocyte	NA
ACH-000560	0.0426443	ECC10	Gastric Cancer	Gastric	NA
ACH-000897	1.97085	FTC238	Thyroid Cancer	Thyroid	NA
ACH-001626	0.333424	OSC20	Head and Neck Cancer	Upper Aerodigestive	NA
ACH-000619	0.799087	PECAPJ15	Head and Neck Cancer	Upper Aerodigestive	NA
ACH-001973	0.0840643	MM485	Skin Cancer	Skin	NA
ACH-001340	0.238787	COV413A	Ovarian Cancer	Ovary	NA
ACH-000546	0.226509	HSC4	Head and Neck Cancer	Upper Aerodigestive	NA
ACH-001709	3.13586	WSUNHL	Lymphoma	Lymphocyte	NA
ACH-002018	0	OMM25	Eye Cancer	Eye	NA
ACH-000153	0.807355	NCIH2052	Lung Cancer	Lung	NA
ACH-000526	0.0565835	HS821T	Non-Cancerous	Fibroblast	NA
ACH-000116	0.933573	OAW28	Ovarian Cancer	Ovary	NA
ACH-000815	2.79701	KMH2	Lymphoma	Lymphocyte	NA
ACH-001270	0.0976108	127399	Sarcoma	Soft Tissue	NA
ACH-000324	0.83996	JHOC5	Ovarian Cancer	Ovary	NA
ACH-001561	0.0285692	MERO84	Lung Cancer	Lung	NA
ACH-000842	0.678072	SW480	Colon/Colorectal Cancer	Colorectal	NA
ACH-000898	0.176323	SNU719	Gastric Cancer	Gastric	NA
ACH-000517	0.545968	SNU410	Pancreatic Cancer	Pancreas	NA
ACH-001415	0.0285692	UMUC7	Bladder Cancer	Urinary Tract	NA
ACH-000681	0.137504	A549	Lung Cancer	Lung	NA
ACH-001310	0.0565835	HA1E	Non-Cancerous	Kidney	NA
ACH-000070	0.713696	697	Leukemia	Blood	ALL
ACH-000484	0.0143553	VMRCRCW	Kidney Cancer	Kidney	NA
ACH-000108	0.0285692	KP3	Pancreatic Cancer	Pancreas	NA
ACH-000808	0.226509	HUH28	Bile Duct Cancer	Bile Duct	NA
ACH-000656	0.925999	SUDHL8	Lymphoma	Lymphocyte	NA
ACH-000166	5.43962	KASUMI6	Leukemia	Blood	AML
ACH-000997	0.0143553	HCT15	Colon/Colorectal Cancer	Colorectal	NA
ACH-000866	0.0565835	NCIH1048	Lung Cancer	Lung	NA
ACH-000819	1.46467	LN18	Brain Cancer	Central Nervous System	NA
ACH-000226	6.26622	SUPM2	Lymphoma	Lymphocyte	NA
ACH-000087	0.0143553	SKES1	Bone Cancer	Bone	NA
ACH-000340	0.0703893	HS870T	Non-Cancerous	Fibroblast	NA
ACH-002005	0.443607	SKMEL19	Skin Cancer	Skin	NA
ACH-000758	0.275007	MKN74	Gastric Cancer	Gastric	NA
ACH-000196	0	HCC1599	Breast Cancer	Breast	NA
ACH-000258	2.32481	DU4475	Breast Cancer	Breast	NA
ACH-000163	0.286881	SW579	Thyroid Cancer	Thyroid	NA
ACH-000076	1.09085	NCO2	Leukemia	Blood	CML
ACH-000509	5.56894	HUT78	Lymphoma	Lymphocyte	NA
ACH-001193	0	SKPNDW	Bone Cancer	Bone	NA
ACH-000571	0.516015	T98G	Brain Cancer	Central Nervous System	NA
ACH-000391	0.0565835	MHHES1	Bone Cancer	Bone	NA
ACH-000293	0.0840643	KLE	Endometrial/Uterine Cancer	Uterus	NA
ACH-000532	0.0285692	SNU61	Colon/Colorectal Cancer	Colorectal	NA
ACH-000584	0.163499	JHOS4	Ovarian Cancer	Ovary	NA
ACH-001690	0.0703893	UPCISCC026	Head and Neck Cancer	Upper Aerodigestive	NA
ACH-000586	0.15056	NCIH1876	Lung Cancer	Lung	NA
ACH-000944	2.56071	NAMALWA	Lymphoma	Lymphocyte	NA
ACH-000561	0.0426443	TDOTT	Esophageal Cancer	Esophagus	NA
ACH-001648	0.111031	SHMAC4	Prostate Cancer	Prostate	NA
ACH-000394	0.0565835	NCIH2081	Lung Cancer	Lung	NA
ACH-000954	0.0703893	HEC1A	Endometrial/Uterine Cancer	Uterus	NA
ACH-000204	0	LP1	Myeloma	Plasma Cell	NA
ACH-000160	0.0565835	BT12	Rhabdoid	Soft Tissue	NA
ACH-000989	0.0703893	SNU175	Colon/Colorectal Cancer	Colorectal	NA
ACH-001347	0	H157	Head and Neck Cancer	Upper Aerodigestive	NA
ACH-000691	0	HCC2157	Breast Cancer	Breast	NA
ACH-000268	0.15056	SNU245	Bile Duct Cancer	Bile Duct	NA
ACH-000119	0	HS863T	Non-Cancerous	Fibroblast	NA
ACH-000379	0.0426443	NCIH1781	Lung Cancer	Lung	NA
ACH-001341	0.124328	DOTC24510	Cervical Cancer	Cervix	NA
ACH-000714	0.0143553	KMS11	Myeloma	Plasma Cell	NA
ACH-000937	1.51096	PF382	Leukemia	Blood	ALL
ACH-000763	2.94673	MM1S	Myeloma	Plasma Cell	NA
ACH-002834	0.344828	PSS131R	Bone Cancer	Bone	NA
ACH-001673	0.536053	TFK1	Bile Duct Cancer	Bile Duct	NA
ACH-000326	2.34199	JURLMK1	Leukemia	Blood	CML
ACH-000300	0.263034	SLR25	Kidney Cancer	Kidney	NA
ACH-000901	0.887525	HCC1359	Lung Cancer	Lung	NA
ACH-000816	0.0285692	NCIH524	Lung Cancer	Lung	NA
ACH-000641	2.65306	CMK	Leukemia	Blood	AML
ACH-000511	0.298658	CALU1	Lung Cancer	Lung	NA
ACH-000583	1.97085	MC116	Lymphoma	Lymphocyte	NA
ACH-000836	0.163499	YD15	Head and Neck Cancer	Upper Aerodigestive	NA
ACH-000975	0	HCC2450	Lung Cancer	Lung	NA
ACH-000109	0.124328	NCIH3255	Lung Cancer	Lung	NA
ACH-000467	0.0143553	HCC56	Colon/Colorectal Cancer	Colorectal	NA
ACH-000712	0.31034	HCC1833	Lung Cancer	Lung	NA
ACH-000671	0.0143553	HUH6	Liver Cancer	Liver	NA
ACH-000523	0.0285692	NCIH1184	Lung Cancer	Lung	NA
ACH-000864	0.0285692	COLO684	Endometrial/Uterine Cancer	Uterus	NA
ACH-000726	0.0143553	TE14	Esophageal Cancer	Esophagus	NA
ACH-000136	0.0426443	CHP126	Neuroblastoma	Peripheral Nervous System	NA
ACH-002067	0.485427	NOS1	Bone Cancer	Bone	NA
ACH-000440	2.62527	CA46	Lymphoma	Lymphocyte	NA
ACH-001461	0	C99	Colon/Colorectal Cancer	Colorectal	NA
ACH-000890	0.124328	SW1271	Lung Cancer	Lung	NA
ACH-001692	0.0426443	UPCISCC040	Head and Neck Cancer	Upper Aerodigestive	NA
ACH-000027	0.263034	GOS3	Brain Cancer	Central Nervous System	NA
ACH-000562	0.189034	HCC78	Lung Cancer	Lung	NA
ACH-000748	0	SJSA1	Bone Cancer	Bone	NA
ACH-001669	3.45154	TANOUE	Leukemia	Blood	AML
ACH-000834	1.12433	UMUC1	Bladder Cancer	Urinary Tract	NA
ACH-000565	0.344828	RCM1	Colon/Colorectal Cancer	Colorectal	NA
ACH-000449	0	MESSA	Sarcoma	Soft Tissue	NA
ACH-000399	0.0840643	NCIH2196	Lung Cancer	Lung	NA
ACH-002080	0	TN2	Neuroblastoma	Peripheral Nervous System	NA
ACH-000770	5.99413	P31FUJ	Leukemia	Blood	AML
ACH-000710	0.389567	NCIH854	Lung Cancer	Lung	NA
ACH-000507	0.124328	KE39	Gastric Cancer	Gastric	NA
ACH-000066	0.432959	HCC4006	Lung Cancer	Lung	NA
ACH-000022	0.0426443	PATU8988S	Pancreatic Cancer	Pancreas	NA
ACH-001668	0.0143553	SUSA	Teratoma	Embryo	NA
ACH-000334	2.86196	DB	Lymphoma	Lymphocyte	NA
ACH-000374	1.04963	HCC1143	Breast Cancer	Breast	NA
ACH-000519	3.20477	PEER	Leukemia	Blood	ALL
ACH-000908	0.367371	SNU520	Gastric Cancer	Gastric	NA
ACH-002003	0.0976108	A375SKINCJ3	Skin Cancer	Skin	NA
ACH-000574	0.0565835	FUOV1	Ovarian Cancer	Ovary	NA
ACH-000148	0.0285692	HS578T	Breast Cancer	Breast	NA
ACH-002461	0.137504	RVH421SKINFV1	Skin Cancer	Skin	NA
ACH-000646	0	OVMANA	Ovarian Cancer	Ovary	NA
ACH-000314	1.35614	HCC2108	Lung Cancer	Lung	NA
ACH-000040	0.475085	U118MG	Brain Cancer	Central Nervous System	NA
ACH-001057	5.81506	DERL2	Lymphoma	Lymphocyte	NA
ACH-000430	0.0703893	TYKNU	Ovarian Cancer	Ovary	NA
ACH-001041	0	CHL1DM	Skin Cancer	Skin	NA
ACH-001977	0	NO36	Lung Cancer	Lung	NA
ACH-000370	0.137504	SNU626	Brain Cancer	Central Nervous System	NA
ACH-001630	0	PEO1	Ovarian Cancer	Ovary	NA
ACH-000437	0.565597	SW1088	Brain Cancer	Central Nervous System	NA
ACH-000498	4.61589	KO52	Leukemia	Blood	AML
ACH-001392	0.0143553	SUM185PE	Breast Cancer	Breast	NA
ACH-000503	0.226509	BICR16	Head and Neck Cancer	Upper Aerodigestive	NA
ACH-000328	0.367371	LN215	Brain Cancer	Central Nervous System	NA
ACH-000403	0.0840643	NCIH747	Colon/Colorectal Cancer	Colorectal	NA
ACH-000400	0.111031	SKCO1	Colon/Colorectal Cancer	Colorectal	NA
ACH-000224	0	HS819T	Non-Cancerous	Fibroblast	NA
ACH-000318	0.815575	TE10	Esophageal Cancer	Esophagus	NA
ACH-001430	0	TC138	Bone Cancer	Bone	NA
ACH-000928	0.0285692	JHUEM1	Endometrial/Uterine Cancer	Uterus	NA
ACH-000893	0.0703893	NCIH1651	Lung Cancer	Lung	NA
ACH-000889	0.137504	KMM1	Myeloma	Plasma Cell	NA
ACH-000799	0.31034	HS695T	Skin Cancer	Skin	NA
ACH-001623	1.52607	ONDA8	Brain Cancer	Central Nervous System	NA
ACH-000736	0.0976108	SNU601	Gastric Cancer	Gastric	NA
ACH-000876	0	MDAMB415	Breast Cancer	Breast	NA
ACH-001232	0.111031	UW228	Brain Cancer	Central Nervous System	NA
ACH-001618	1.12433	OCIM2	Leukemia	Blood	AML
ACH-000235	1.15704	PANC0403	Pancreatic Cancer	Pancreas	NA
ACH-000381	0.0840643	T84	Colon/Colorectal Cancer	Colorectal	NA
ACH-001993	0.333424	NALM16	Leukemia	Blood	ALL
ACH-001301	0.0143553	COGN278	Neuroblastoma	Peripheral Nervous System	NA
ACH-000854	1.72247	OCIMY5	Myeloma	Plasma Cell	NA
ACH-000187	0.0840643	CORL311	Lung Cancer	Lung	NA
ACH-000543	0.475085	SNU489	Brain Cancer	Central Nervous System	NA
ACH-000569	0.0285692	ISTMES1	Lung Cancer	Lung	NA
ACH-000668	0.137504	HCC70	Breast Cancer	Breast	NA
ACH-000134	0.0143553	HS274T	Non-Cancerous	Fibroblast	NA
ACH-000924	0.0565835	NCIH2172	Lung Cancer	Lung	NA
ACH-001450	3.26903	BLUE1	Lymphoma	Lymphocyte	NA
ACH-000296	0.201634	OUMS23	Colon/Colorectal Cancer	Colorectal	NA
ACH-000713	0.0976108	CAOV3	Ovarian Cancer	Ovary	NA
ACH-001360	0	MS751	Cervical Cancer	Cervix	NA
ACH-000273	0.422233	SF539	Brain Cancer	Central Nervous System	NA
ACH-001715	0.748461	CAL72	Bone Cancer	Bone	NA
ACH-001617	2.90497	OCILY7	Lymphoma	Lymphocyte	NA
ACH-000639	0.0976108	NCIH211	Lung Cancer	Lung	NA
ACH-000590	0.226509	NCIH2073	Lung Cancer	Lung	NA
ACH-000553	0.226509	SQ1	Lung Cancer	Lung	NA
ACH-000084	6.94005	MUTZ3	Leukemia	Blood	AML
ACH-000094	0.659925	HPAFII	Pancreatic Cancer	Pancreas	NA
ACH-000361	0.124328	SKHEP1	Liver Cancer	Liver	NA
ACH-000719	0.0565835	RMGI	Ovarian Cancer	Ovary	NA
ACH-001396	0	SUM52PE	Breast Cancer	Breast	NA
ACH-001848	0.0565835	ICC8	Bile Duct Cancer	Bile Duct	NA
ACH-000339	2.19219	HCC461	Lung Cancer	Lung	NA
ACH-002048	0	RMSYM	Sarcoma	Soft Tissue	NA
ACH-000218	5.52105	PL21	Leukemia	Blood	AML
ACH-000789	0.0285692	NCIH810	Lung Cancer	Lung	NA
ACH-000413	0	HS739T	Non-Cancerous	Fibroblast	NA
ACH-000125	0.0285692	TO175T	Non-Cancerous	Fibroblast	NA
ACH-000180	0.0703893	HS839T	Non-Cancerous	Fibroblast	NA
ACH-000215	0.970854	LN382	Brain Cancer	Central Nervous System	NA
ACH-001001	0.545968	143B	Bone Cancer	Bone	NA
ACH-000407	0.124328	SNU685	Endometrial/Uterine Cancer	Uterus	NA
ACH-002027	0.238787	HOUAI	Endometrial/Uterine Cancer	Uterus	NA
ACH-001132	6.10957	MTA	Lymphoma	Lymphocyte	NA
ACH-001278	0	BIN67	Ovarian Cancer	Ovary	NA
ACH-000032	2.59455	MHHCALL3	Leukemia	Blood	ALL
ACH-001419	0.0565835	VP229	Breast Cancer	Breast	NA
ACH-000494	0.0426443	OELE	Non-Cancerous	Ovary	NA
ACH-000865	0.0143553	KYSE450	Esophageal Cancer	Esophagus	NA
ACH-000439	2.32481	ME1	Leukemia	Blood	AML
ACH-001523	0.464668	HSC1	Skin Cancer	Skin	NA
ACH-000024	0.454176	OPM2	Myeloma	Plasma Cell	NA
ACH-000674	0.378512	NUGC4	Gastric Cancer	Gastric	NA
ACH-000670	0	SBC5	Lung Cancer	Lung	NA
ACH-000599	0.176323	PATU8902	Pancreatic Cancer	Pancreas	NA
ACH-000263	1.22651	KASUMI1	Leukemia	Blood	AML
ACH-000303	0.226509	SNU5	Gastric Cancer	Gastric	NA
ACH-001551	0.298658	MCC142	Skin Cancer	Skin	NA
ACH-000793	0.189034	KATOIII	Gastric Cancer	Gastric	NA
ACH-002511	0.475085	M140325	Skin Cancer	Skin	NA
ACH-000286	0.0840643	SNU1033	Colon/Colorectal Cancer	Colorectal	NA
ACH-000250	0.0565835	KMRC20	Kidney Cancer	Kidney	NA
ACH-000299	4.94251	HNT34	Leukemia	Blood	AML
ACH-000139	0.356144	PANC0327	Pancreatic Cancer	Pancreas	NA
ACH-001735	2.06005	SEMK2	Leukemia	Blood	ALL
ACH-001389	0	SUM1315MO2	Breast Cancer	Breast	NA
ACH-001183	0.0840643	RT11284	Bladder Cancer	Urinary Tract	NA
ACH-000551	0.298658	K562	Leukemia	Blood	CML
ACH-001163	0	CCLFPEDS0001T	Kidney Cancer	Kidney	NA
ACH-000037	0.321928	S117	Sarcoma	Soft Tissue	NA
ACH-000744	0.275007	NCIH1623	Lung Cancer	Lung	NA
ACH-000420	0.807355	SNU449	Liver Cancer	Liver	NA
ACH-000336	4.26978	OCIAML3	Leukemia	Blood	AML
ACH-000486	1.45418	KU1919	Bladder Cancer	Urinary Tract	NA
ACH-000679	0.137504	OE19	Esophageal Cancer	Esophagus	NA
ACH-001557	0.0143553	MERO41	Lung Cancer	Lung	NA
ACH-000247	0.400538	OCUM1	Gastric Cancer	Gastric	NA
ACH-000947	0.0143553	OVK18	Ovarian Cancer	Ovary	NA
ACH-000807	0.0285692	SNU738	Brain Cancer	Central Nervous System	NA
ACH-000476	0.432959	JHH4	Liver Cancer	Liver	NA
ACH-000525	0.137504	NCIH2171	Lung Cancer	Lung	NA
ACH-001148	1.36177	OCILY132	Lymphoma	Lymphocyte	NA
ACH-000853	0.124328	NCIH661	Lung Cancer	Lung	NA
ACH-000083	0.0840643	HS281T	Non-Cancerous	Fibroblast	NA
ACH-000479	0.0840643	KNS81	Brain Cancer	Central Nervous System	NA
ACH-000230	0.0426443	HS742T	Non-Cancerous	Fibroblast	NA
ACH-001664	0.0143553	SNU638	Gastric Cancer	Gastric	NA
ACH-000955	0.0703893	SNU407	Colon/Colorectal Cancer	Colorectal	NA
ACH-000049	0.201634	HEKTE	Non-Cancerous	Kidney	NA
ACH-000675	0.31034	NCIH1734	Lung Cancer	Lung	NA
ACH-000199	0.0143553	HS255T	Non-Cancerous	Fibroblast	NA
ACH-000193	4.28614	KARPAS620	Myeloma	Plasma Cell	NA
ACH-000538	0.0143553	HUTU80	Gastric Cancer	Gastric	NA
ACH-001647	5.35473	SHI1	Leukemia	Blood	AML
ACH-001649	0.124328	SHMAC5	Prostate Cancer	Prostate	NA
ACH-000155	0.238787	SW1990	Pancreatic Cancer	Pancreas	NA
ACH-000270	0.0143553	HPAC	Pancreatic Cancer	Pancreas	NA
ACH-000683	0.0143553	SNU503	Colon/Colorectal Cancer	Colorectal	NA
ACH-002017	0.0143553	OMM1	Eye Cancer	Eye	NA
ACH-000655	0.163499	SF268	Brain Cancer	Central Nervous System	NA
ACH-000145	1.09085	SKLMS1	Sarcoma	Soft Tissue	NA
ACH-001495	0.485427	EMTOKA	Endometrial/Uterine Cancer	Uterus	NA
ACH-000188	0.400538	SCC25	Head and Neck Cancer	Upper Aerodigestive	NA
ACH-000080	3.46074	BDCM	Leukemia	Blood	AML
ACH-000146	5.65535	THP1	Leukemia	Blood	AML
ACH-000415	0.0285692	BICR6	Head and Neck Cancer	Upper Aerodigestive	NA
ACH-001518	0.124328	HEC116	Endometrial/Uterine Cancer	Uterus	NA
ACH-000891	0.0565835	HCC1438	Lung Cancer	Lung	NA
ACH-001625	1.85599	OSC19	Head and Neck Cancer	Upper Aerodigestive	NA
ACH-000895	0.0565835	CL34	Colon/Colorectal Cancer	Colorectal	NA
ACH-000851	0.0143553	MORCPR	Lung Cancer	Lung	NA
ACH-000824	0.137504	KYSE510	Esophageal Cancer	Esophagus	NA
ACH-000506	0.0285692	NCIH146	Lung Cancer	Lung	NA
ACH-000540	0.0840643	HS606T	Non-Cancerous	Fibroblast	NA
ACH-000061	3.49697	HH	Lymphoma	Lymphocyte	NA
ACH-000185	0.0976108	HS737T	Non-Cancerous	Fibroblast	NA
ACH-000568	0.0703893	UACC812	Breast Cancer	Breast	NA
ACH-000707	2.96717	P3HR1	Lymphoma	Lymphocyte	NA
ACH-000603	0.321928	BEN	Lung Cancer	Lung	NA
ACH-000983	1.42223	KCL22	Leukemia	Blood	CML
ACH-000541	2.05658	KMS34	Myeloma	Plasma Cell	NA
ACH-000680	0.0143553	SW948	Colon/Colorectal Cancer	Colorectal	NA
ACH-002460	0.111031	HT144SKINFV2	Skin Cancer	Skin	NA
ACH-000111	0.0143553	HCC1187	Breast Cancer	Breast	NA
ACH-002463	0.111031	RPE1SS77	Non-Cancerous	Eye	NA
ACH-000369	1.42223	MOLM16	Leukemia	Blood	AML
ACH-000618	0.176323	SNU1041	Head and Neck Cancer	Upper Aerodigestive	NA
ACH-000470	0.505891	SW1463	Colon/Colorectal Cancer	Colorectal	NA
ACH-002039	0.0703893	PK8	Pancreatic Cancer	Pancreas	NA
ACH-000118	0.263034	HUPT3	Pancreatic Cancer	Pancreas	NA
ACH-000614	0.0840643	RVH421	Skin Cancer	Skin	NA
ACH-001338	0	CHP134	Neuroblastoma	Peripheral Nervous System	NA
ACH-000432	0.321928	BV173	Leukemia	Blood	CML
ACH-000556	0	SIHA	Cervical Cancer	Cervix	NA
ACH-001804	0.0143553	LPS510	Liposarcoma	Soft Tissue	NA
ACH-001386	0	SCLC22H	Lung Cancer	Lung	NA
ACH-001060	3.59694	DL40	Lymphoma	Lymphocyte	NA
ACH-001525	0	HT3	Cervical Cancer	Cervix	NA
ACH-001539	4.87431	KML1	Lymphoma	Lymphocyte	NA
ACH-000014	0.0703893	HS294T	Skin Cancer	Skin	NA
ACH-002785	0.0703893	NCCLMS1C1	Unknown	Soft Tissue	NA
ACH-000637	0.137504	KYSE520	Esophageal Cancer	Esophagus	NA
ACH-002693	0.0143553	S462	Sarcoma	Peripheral Nervous System	NA
ACH-000455	0.286881	LN428	Brain Cancer	Central Nervous System	NA
ACH-000389	0.124328	H4	Brain Cancer	Central Nervous System	NA
ACH-002710	0.422233	MPNST724	Sarcoma	Peripheral Nervous System	NA
ACH-000129	0.0565835	NCIH1341	Lung Cancer	Lung	NA
ACH-000490	0.0285692	SF767	Cervical Cancer	Cervix	NA
ACH-000434	1.15056	NCIH1915	Lung Cancer	Lung	NA
ACH-001086	0.0703893	HELA	Cervical Cancer	Cervix	NA
ACH-002042	1.42223	T3M5	Thyroid Cancer	Thyroid	NA
ACH-000597	0	TTC709	Rhabdoid	Soft Tissue	NA
ACH-000756	0.201634	GI1	Brain Cancer	Central Nervous System	NA
ACH-000396	0.0840643	J82	Bladder Cancer	Urinary Tract	NA
ACH-000089	0.0976108	NCIH684	Colon/Colorectal Cancer	Colorectal	NA
ACH-000371	4.39506	RL	Lymphoma	Lymphocyte	NA
ACH-000265	0.594549	KP4	Pancreatic Cancer	Pancreas	NA
ACH-000132	0.0143553	JHOS2	Ovarian Cancer	Ovary	NA
ACH-000216	1.01436	JHESOAD1	Esophageal Cancer	Esophagus	NA
ACH-000613	0.137504	HOS	Bone Cancer	Bone	NA
ACH-000855	0.0703893	KYSE150	Esophageal Cancer	Esophagus	NA
ACH-000906	0.378512	ES2	Ovarian Cancer	Ovary	NA
ACH-000348	0.575312	RPMI7951	Skin Cancer	Skin	NA
ACH-001100	5.83668	KHYG	Lymphoma	Lymphocyte	NA
ACH-000238	0.411426	SCC4	Head and Neck Cancer	Upper Aerodigestive	NA
ACH-000237	0.163499	JHOM1	Ovarian Cancer	Ovary	NA
ACH-000393	0.464668	HLF	Liver Cancer	Liver	NA
ACH-000623	0.0426443	SNU201	Brain Cancer	Central Nervous System	NA
ACH-000359	0.0703893	MG63	Bone Cancer	Bone	NA
ACH-001028	0.378512	CHLA06ATRT	Rhabdoid	Soft Tissue	NA
ACH-000621	0.0840643	MDAMB157	Breast Cancer	Breast	NA
ACH-001641	0.286881	SAT	Head and Neck Cancer	Upper Aerodigestive	NA
ACH-000056	5.21801	DOHH2	Lymphoma	Lymphocyte	NA
ACH-000483	0.163499	SNU182	Liver Cancer	Liver	NA
ACH-000514	0.0840643	NCIH1092	Lung Cancer	Lung	NA
ACH-000051	0	TE617T	Sarcoma	Soft Tissue	NA
ACH-000043	0.0703893	HS895T	Non-Cancerous	Fibroblast	NA
ACH-000936	0.176323	EFO27	Ovarian Cancer	Ovary	NA
ACH-000716	0.226509	TT2609C02	Thyroid Cancer	Thyroid	NA
ACH-000988	0.0703893	MFE319	Endometrial/Uterine Cancer	Uterus	NA
ACH-000952	0.0703893	MDAPCA2B	Prostate Cancer	Prostate	NA
ACH-000065	4.37573	OCIAML5	Leukemia	Blood	AML
ACH-000609	0.910733	SF126	Brain Cancer	Central Nervous System	NA
ACH-001411	0	UMUC5	Bladder Cancer	Urinary Tract	NA
ACH-000504	0.137504	SNB75	Brain Cancer	Central Nervous System	NA
ACH-000956	0	22RV1	Prostate Cancer	Prostate	NA
ACH-001712	0.0426443	HS860T	Bone Cancer	Bone	NA
ACH-000652	1.49057	SUIT2	Pancreatic Cancer	Pancreas	NA
ACH-000414	1.46989	NCIH1944	Lung Cancer	Lung	NA
ACH-000472	0.443607	HSC2	Head and Neck Cancer	Upper Aerodigestive	NA
ACH-000007	0.124328	LS513	Colon/Colorectal Cancer	Colorectal	NA
ACH-000446	0.0840643	KPNSI9S	Neuroblastoma	Peripheral Nervous System	NA
ACH-000386	5.42425	KG1	Leukemia	Blood	AML
ACH-001850	0.0285692	G415	Gallbladder Cancer	Bile Duct	NA
ACH-000755	0.189034	HCC2218	Breast Cancer	Breast	NA
ACH-000028	0	KPL1	Breast Cancer	Breast	NA
ACH-000665	3.73877	SKMES1	Lung Cancer	Lung	NA
ACH-000078	0.0426443	MHHNB11	Neuroblastoma	Peripheral Nervous System	NA
ACH-002046	0.536053	HTMMT	Endometrial/Uterine Cancer	Uterus	NA
ACH-000397	0.0565835	TEN	Endometrial/Uterine Cancer	Uterus	NA
ACH-000229	0.0143553	HS822T	Non-Cancerous	Fibroblast	NA
ACH-000518	0.214125	CAL33	Head and Neck Cancer	Upper Aerodigestive	NA
ACH-001566	0.0840643	MM370	Skin Cancer	Skin	NA
ACH-000252	0.790772	LS1034	Colon/Colorectal Cancer	Colorectal	NA
ACH-000572	0.163499	G361	Skin Cancer	Skin	NA
ACH-001605	0	NO10	Brain Cancer	Central Nervous System	NA
ACH-000277	0	HCC1419	Breast Cancer	Breast	NA
ACH-001239	0.411426	WM2664	Skin Cancer	Skin	NA
ACH-000786	4.09845	DAUDI	Lymphoma	Lymphocyte	NA
ACH-000803	0.201634	COLO668	Lung Cancer	Lung	NA
ACH-001970	0.0840643	MM253	Skin Cancer	Skin	NA
ACH-002038	0.0565835	HSKTC	Ovarian Cancer	Ovary	NA
ACH-000537	0.831877	SNU761	Liver Cancer	Liver	NA
ACH-000419	0.0565835	KMS28BM	Myeloma	Plasma Cell	NA
ACH-000724	0.0565835	HT1376	Bladder Cancer	Urinary Tract	NA
ACH-000522	0.432959	UMUC3	Bladder Cancer	Urinary Tract	NA
ACH-001549	0.0426443	LU135	Lung Cancer	Lung	NA
ACH-000706	0.0976108	EKVX	Lung Cancer	Lung	NA
ACH-000737	0.0703893	NCIH1385	Lung Cancer	Lung	NA
ACH-000548	2.09085	BHY	Head and Neck Cancer	Upper Aerodigestive	NA
ACH-001839	0.411426	ICC137	Bile Duct Cancer	Bile Duct	NA
ACH-001799	0.773996	LPS141	Liposarcoma	Soft Tissue	NA
ACH-001573	1.04264	MOLM1	Leukemia	Blood	CML
ACH-000425	0.137504	UACC62	Skin Cancer	Skin	NA
ACH-000375	0.0976108	G402	Kidney Cancer	Kidney	NA
ACH-000753	0.176323	JMSU1	Bladder Cancer	Urinary Tract	NA
ACH-000275	0.0143553	HS834T	Non-Cancerous	Fibroblast	NA
ACH-000735	1.58976	PECAPJ49	Head and Neck Cancer	Upper Aerodigestive	NA
ACH-000654	1.36177	RAJI	Lymphoma	Lymphocyte	NA
ACH-001067	0.31034	F5	Brain Cancer	Central Nervous System	NA
ACH-000170	0.250962	PRECLH	Non-Cancerous	Prostate	NA
ACH-001394	0.0565835	SUM229PE	Breast Cancer	Breast	NA
ACH-000404	0.263034	K029AX	Skin Cancer	Skin	NA
ACH-000882	0.713696	IGR1	Skin Cancer	Skin	NA
ACH-001509	0.0703893	H357	Head and Neck Cancer	Upper Aerodigestive	NA
ACH-000210	0.0143553	CADOES1	Bone Cancer	Bone	NA
ACH-000254	0.555816	SCC15	Head and Neck Cancer	Upper Aerodigestive	NA
ACH-000604	0.0285692	KYO1	Leukemia	Blood	CML
ACH-000090	0.356144	PC3	Prostate Cancer	Prostate	NA
ACH-000195	1.28688	SET2	Leukemia	Blood	AML
ACH-001791	0.0976108	LPS6	Liposarcoma	Soft Tissue	NA
ACH-001650	0.275007	SISO	Cervical Cancer	Cervix	NA
ACH-000605	0.0143553	TE6	Esophageal Cancer	Esophagus	NA
ACH-000458	0.111031	CJM	Skin Cancer	Skin	NA
ACH-002084	0.0703893	MMAC	Skin Cancer	Skin	NA
ACH-000004	2.41954	HEL	Leukemia	Blood	AML
ACH-000251	1.94486	NCIH2887	Lung Cancer	Lung	NA
ACH-000241	1.72683	JK1	Leukemia	Blood	CML
ACH-001194	0.201634	SKRC31	Kidney Cancer	Kidney	NA
ACH-002055	3.12102	TL1	Lymphoma	Lymphocyte	NA
ACH-001443	0.739848	ASH3	Thyroid Cancer	Thyroid	NA
ACH-000688	0.454176	OV7	Ovarian Cancer	Ovary	NA
ACH-000405	3.77083	MEC1	Leukemia	Blood	CLL
ACH-000821	0.895303	EJM	Myeloma	Plasma Cell	NA
ACH-001677	0.389567	U2904	Lymphoma	Lymphocyte	NA
ACH-001627	0.176323	P4E6	Prostate Cancer	Prostate	NA
ACH-000951	0	NCIH2342	Lung Cancer	Lung	NA
ACH-001036	2.36457	CMK115	Leukemia	Blood	AML
ACH-000547	0.321928	HT1197	Bladder Cancer	Urinary Tract	NA
ACH-000826	0.863938	CAL12T	Lung Cancer	Lung	NA
ACH-001147	3.07211	OCILY12	Lymphoma	Lymphocyte	NA
ACH-000162	1.67807	GA10	Lymphoma	Lymphocyte	NA
ACH-001751	0	RH36	Sarcoma	Soft Tissue	NA
ACH-000018	0.0565835	T24	Bladder Cancer	Urinary Tract	NA
ACH-000721	0	HMC18	Breast Cancer	Breast	NA
ACH-000003	0.0285692	CACO2	Colon/Colorectal Cancer	Colorectal	NA
ACH-000092	0.0565835	NCIH2452	Lung Cancer	Lung	NA
ACH-000669	0.400538	SW900	Lung Cancer	Lung	NA
ACH-001099	0.0285692	KD	Rhabdoid	Soft Tissue	NA
ACH-000648	2.13422	NCIH28	Lung Cancer	Lung	NA
ACH-000950	0.0840643	LOVO	Colon/Colorectal Cancer	Colorectal	NA
ACH-000050	4.73335	NCIH929	Myeloma	Plasma Cell	NA
ACH-001106	4.49761	KOPN8	Leukemia	Blood	ALL
ACH-000367	0.286881	NCIH226	Lung Cancer	Lung	NA
ACH-000589	0.189034	NCIH1437	Lung Cancer	Lung	NA
ACH-000564	3.66221	KHM1B	Myeloma	Plasma Cell	NA
ACH-001522	0.0703893	HMY1	Skin Cancer	Skin	NA
ACH-000831	0.286881	HEC50B	Endometrial/Uterine Cancer	Uterus	NA
ACH-000424	0.0143553	TC71	Bone Cancer	Bone	NA
ACH-000409	0.0143553	OVSAHO	Ovarian Cancer	Ovary	NA
ACH-000616	2.40871	HS746T	Gastric Cancer	Gastric	NA
ACH-000628	0.739848	NCIH596	Lung Cancer	Lung	NA
ACH-000512	5.01391	INA6	Myeloma	Plasma Cell	NA
ACH-000232	0.0565835	U251MG	Brain Cancer	Central Nervous System	NA
ACH-000820	0.201634	SW403	Colon/Colorectal Cancer	Colorectal	NA
ACH-001295	0	Y79	Eye Cancer	Eye	NA
ACH-001164	1.72247	CCLFPEDS0003T	Sarcoma	Soft Tissue	NA
ACH-000806	4.82782	L540	Lymphoma	Lymphocyte	NA
ACH-000645	0.0285692	JL1	Lung Cancer	Lung	NA
ACH-000099	0.0143553	SIMA	Neuroblastoma	Peripheral Nervous System	NA
ACH-000902	0.0703893	CAL148	Breast Cancer	Breast	NA
ACH-000649	0.545968	786O	Kidney Cancer	Kidney	NA
ACH-000086	1.01436	ACCMESO1	Lung Cancer	Lung	NA
ACH-000149	0.214125	SKNSH	Neuroblastoma	Peripheral Nervous System	NA
ACH-000142	0.15056	CAL29	Bladder Cancer	Urinary Tract	NA
ACH-000227	0.0143553	KPNYN	Neuroblastoma	Peripheral Nervous System	NA
ACH-000697	5.56316	A3KAW	Lymphoma	Lymphocyte	NA
ACH-000942	0.970854	HPBALL	Leukemia	Blood	ALL
ACH-000264	0.575312	CALU6	Lung Cancer	Lung	NA
ACH-000809	0.0143553	KYSE410	Esophageal Cancer	Esophagus	NA
ACH-000100	0	RH41	Sarcoma	Soft Tissue	NA
ACH-000060	0.389567	PANC1005	Pancreatic Cancer	Pancreas	NA
ACH-000001	0	NIHOVCAR3	Ovarian Cancer	Ovary	NA
ACH-000957	0.0143553	LS180	Colon/Colorectal Cancer	Colorectal	NA
ACH-000650	0.201634	IGR37	Skin Cancer	Skin	NA
ACH-001096	0	JR	Sarcoma	Soft Tissue	NA
ACH-000239	0.0565835	HUG1N	Gastric Cancer	Gastric	NA
ACH-000762	0.15056	YD38	Head and Neck Cancer	Upper Aerodigestive	NA
ACH-000922	2.37851	RCHACV	Leukemia	Blood	ALL
ACH-000859	0.0285692	HCC1954	Breast Cancer	Breast	NA
ACH-000990	0	HEC108	Endometrial/Uterine Cancer	Uterus	NA
ACH-000410	0.0143553	SAOS2	Bone Cancer	Bone	NA
ACH-000927	0	BT474	Breast Cancer	Breast	NA
ACH-001853	0	KMCH1	Bile Duct Cancer	Bile Duct	NA
ACH-000694	0.214125	TE9	Esophageal Cancer	Esophagus	NA
ACH-000935	1.01436	MDST8	Colon/Colorectal Cancer	Colorectal	NA
ACH-000918	5.38991	MOLT16	Leukemia	Blood	ALL
ACH-000761	0.263034	NUGC2	Gastric Cancer	Gastric	NA
ACH-001563	0.0143553	MM127	Skin Cancer	Skin	NA
ACH-000974	0.137504	SNGM	Endometrial/Uterine Cancer	Uterus	NA
ACH-000297	0.0143553	NCIH889	Lung Cancer	Lung	NA
ACH-001719	0.613532	OCIC4P	Ovarian Cancer	Ovary	NA
ACH-000243	2.36457	DANG	Pancreatic Cancer	Pancreas	NA
ACH-001418	0.111031	UWB1289	Ovarian Cancer	Ovary	NA
ACH-000362	5.49729	MOLM13	Leukemia	Blood	AML
ACH-000843	0.0285692	HARA	Lung Cancer	Lung	NA
ACH-000840	0.443607	HCC366	Lung Cancer	Lung	NA
ACH-001852	0.298658	HKGZCC	Bile Duct Cancer	Bile Duct	NA
ACH-001528	3.0072	IHH4	Thyroid Cancer	Thyroid	NA
ACH-001656	0.526069	SKNO1	Leukemia	Blood	AML
ACH-000016	0.286881	SLR21	Kidney Cancer	Kidney	NA
ACH-000165	0.0703893	HS751T	Non-Cancerous	Fibroblast	NA
ACH-001460	0.214125	C84	Colon/Colorectal Cancer	Colorectal	NA
ACH-000592	0.83996	TM31	Brain Cancer	Central Nervous System	NA
ACH-001192	0.0143553	SKNEP1	Bone Cancer	Bone	NA
ACH-000045	4.72137	MV411	Leukemia	Blood	AML
ACH-000741	0.356144	UBLC1	Bladder Cancer	Urinary Tract	NA
ACH-000912	0.0426443	NCIH2286	Lung Cancer	Lung	NA
ACH-000529	0.0976108	T173	Non-Cancerous	Fibroblast	NA
ACH-000508	0	CORL88	Lung Cancer	Lung	NA
ACH-000577	1.91456	JHH2	Liver Cancer	Liver	NA
ACH-000768	1.88753	MDAMB231	Breast Cancer	Breast	NA
ACH-000636	1.63227	RPMI8402	Leukemia	Blood	ALL
ACH-000667	1.84398	HCC44	Lung Cancer	Lung	NA
ACH-000905	0.124328	5637	Bladder Cancer	Urinary Tract	NA
ACH-001494	0.15056	EGI1	Bile Duct Cancer	Bile Duct	NA
ACH-000387	1.41684	TF1	Leukemia	Blood	AML
ACH-002510	0	M040416	Skin Cancer	Skin	NA
ACH-001303	0	NB1643	Neuroblastoma	Peripheral Nervous System	NA
ACH-000026	0.226509	253JBV	Bladder Cancer	Urinary Tract	NA
ACH-000838	1.77821	AMO1	Myeloma	Plasma Cell	NA
ACH-001172	0.62293	U251MGDM	Brain Cancer	Central Nervous System	NA
ACH-000822	0.0976108	SKMEL24	Skin Cancer	Skin	NA
ACH-000531	0.0565835	RS5	Non-Cancerous	Fibroblast	NA
ACH-000349	0.321928	HCC1500	Breast Cancer	Breast	NA
ACH-000527	0.124328	OVISE	Ovarian Cancer	Ovary	NA
ACH-000279	0.0703893	EWS502	Bone Cancer	Bone	NA
ACH-000516	1.20163	CAL78	Bone Cancer	Bone	NA
ACH-000812	0.0426443	COLO783	Skin Cancer	Skin	NA
ACH-001300	0	CHLA15	Neuroblastoma	Peripheral Nervous System	NA
ACH-000524	0.0285692	KURAMOCHI	Ovarian Cancer	Ovary	NA
ACH-000611	1.05658	SUDHL6	Lymphoma	Lymphocyte	NA
ACH-000411	0.367371	769P	Kidney Cancer	Kidney	NA
ACH-000718	0.111031	NCIH2291	Lung Cancer	Lung	NA
ACH-000903	0.367371	FTC133	Thyroid Cancer	Thyroid	NA
ACH-002021	0	T3M3	Endometrial/Uterine Cancer	Uterus	NA
ACH-000433	0.137504	CAKI1	Kidney Cancer	Kidney	NA
ACH-000499	0.15056	EW8	Bone Cancer	Bone	NA
ACH-000278	0.214125	COV362	Ovarian Cancer	Ovary	NA
ACH-000202	0.0565835	COLO320	Colon/Colorectal Cancer	Colorectal	NA
ACH-001736	2.28688	HB1119	Leukemia	Blood	ALL
ACH-001379	0.137504	PACADD161	Pancreatic Cancer	Pancreas	NA
ACH-000128	0.0143553	LN319	Brain Cancer	Central Nervous System	NA
ACH-000696	0.298658	OVCAR8	Ovarian Cancer	Ovary	NA
ACH-000041	0.516015	RDES	Bone Cancer	Bone	NA
ACH-000214	0.0143553	HS675T	Non-Cancerous	Fibroblast	NA
ACH-000747	0.0565835	NCIH1703	Lung Cancer	Lung	NA
ACH-001307	0.111031	8505C	Thyroid Cancer	Thyroid	NA
ACH-000341	0.0143553	SKNFI	Neuroblastoma	Peripheral Nervous System	NA
ACH-001740	0.0143553	RH28	Sarcoma	Soft Tissue	NA
ACH-000417	1.15056	PANC0813	Pancreatic Cancer	Pancreas	NA
ACH-001393	0	SUM190PT	Breast Cancer	Breast	NA
ACH-000120	0.0840643	CHP212	Neuroblastoma	Peripheral Nervous System	NA
ACH-001694	0.226509	UPCISCC074	Head and Neck Cancer	Upper Aerodigestive	NA
ACH-001542	0.298658	KON	Head and Neck Cancer	Upper Aerodigestive	NA
ACH-002509	0.0285692	WM4235	Skin Cancer	Skin	NA
ACH-000438	0.0976108	LU65	Lung Cancer	Lung	NA
ACH-001366	0.0143553	NGP	Neuroblastoma	Peripheral Nervous System	NA
ACH-000653	1.41684	JJN3	Myeloma	Plasma Cell	NA
ACH-000839	0.378512	SCABER	Bladder Cancer	Urinary Tract	NA
ACH-000673	0.124328	LN443	Brain Cancer	Central Nervous System	NA
ACH-001524	0.0840643	HSC5	Skin Cancer	Skin	NA
ACH-000069	3.71039	HS611T	Lymphoma	Lymphocyte	NA
ACH-000323	0.422233	42MGBA	Brain Cancer	Central Nervous System	NA
ACH-000021	0.0143553	NCIH1693	Lung Cancer	Lung	NA
ACH-001863	0.176323	TKKK	Bile Duct Cancer	Bile Duct	NA
ACH-000980	0.263034	NCIH1155	Lung Cancer	Lung	NA
ACH-000106	5.17273	JVM2	Lymphoma	Lymphocyte	NA
ACH-000734	0.0976108	JHH5	Liver Cancer	Liver	NA
ACH-000845	2.74201	NCIH1373	Lung Cancer	Lung	NA
ACH-001982	0.226509	NZM3	Skin Cancer	Skin	NA
ACH-000730	0.0285692	SKMEL5	Skin Cancer	Skin	NA
ACH-001334	0.0426443	C4I	Cervical Cancer	Cervix	NA
ACH-000698	0	DMS53	Lung Cancer	Lung	NA
ACH-000802	0.378512	BFTC905	Bladder Cancer	Urinary Tract	NA
ACH-001836	1.8679	ICC108	Bile Duct Cancer	Bile Duct	NA
ACH-000573	0.678072	MDAMB436	Breast Cancer	Breast	NA
ACH-001699	0.275007	UPCISCC131	Head and Neck Cancer	Upper Aerodigestive	NA
ACH-000963	0.0285692	CCK81	Colon/Colorectal Cancer	Colorectal	NA
ACH-001567	0.111031	MM383	Skin Cancer	Skin	NA
ACH-001653	0.575312	SKGT2	Gastric Cancer	Gastric	NA
ACH-000852	0.659925	NCIH1435	Lung Cancer	Lung	NA
ACH-001862	0.613532	TGBC52TKB	Bile Duct Cancer	Bile Duct	NA
ACH-000661	0.250962	WM1799	Skin Cancer	Skin	NA
ACH-001500	0.367371	FLO1	Esophageal Cancer	Esophagus	NA
ACH-001190	0.15056	SKMEL2	Skin Cancer	Skin	NA
ACH-002467	0.189034	RPE1SS51	Non-Cancerous	Eye	NA
ACH-000364	0.214125	U2OS	Bone Cancer	Bone	NA
ACH-000448	1.01436	NCIH1666	Lung Cancer	Lung	NA
ACH-000932	0.124328	SNU1	Gastric Cancer	Gastric	NA
ACH-000783	0.545968	CAMA1	Breast Cancer	Breast	NA
ACH-002044	0	HSQ89	Head and Neck Cancer	Upper Aerodigestive	NA
ACH-000301	1.5656	LAMA84	Leukemia	Blood	CML
ACH-002459	0.214125	HT144SKINFV3	Skin Cancer	Skin	NA
ACH-000976	0.137504	HUCCT1	Bile Duct Cancer	Bile Duct	NA
ACH-001516	0	HCSC1	Cervical Cancer	Cervix	NA
ACH-001354	0	LAN2	Neuroblastoma	Peripheral Nervous System	NA
ACH-001645	0.15056	SEKI	Skin Cancer	Skin	NA
ACH-000867	0	CHAGOK1	Lung Cancer	Lung	NA
ACH-000304	0.111031	WM115	Skin Cancer	Skin	NA
ACH-002069	0.250962	HSOS1	Bone Cancer	Bone	NA
ACH-000931	0.0143553	HMCB	Skin Cancer	Skin	NA
ACH-001374	0.0426443	PA1	Ovarian Cancer	Ovary	NA
ACH-000302	0.214125	SNU1077	Endometrial/Uterine Cancer	Uterus	NA
ACH-000305	1.5656	ECGI10	Esophageal Cancer	Esophagus	NA
ACH-000072	0.464668	MEG01	Leukemia	Blood	CML
ACH-000766	1.45418	NCIH1648	Lung Cancer	Lung	NA
ACH-000533	0.286881	NCIH2004RT	Rhabdoid	Soft Tissue	NA
ACH-000343	0.0143553	NCIH522	Lung Cancer	Lung	NA
ACH-000171	1.1375	VMRCRCZ	Kidney Cancer	Kidney	NA
ACH-000173	0.432959	JHUEM3	Endometrial/Uterine Cancer	Uterus	NA
ACH-000535	0.250962	BXPC3	Pancreatic Cancer	Pancreas	NA
ACH-000774	0.189034	RERFLCAD2	Lung Cancer	Lung	NA
ACH-000178	0.669027	HS766T	Pancreatic Cancer	Pancreas	NA
ACH-001306	0.495695	8305C	Thyroid Cancer	Thyroid	NA
ACH-000994	0.0565835	HEC59	Endometrial/Uterine Cancer	Uterus	NA
ACH-001188	0	SHSY5Y	Neuroblastoma	Peripheral Nervous System	NA
ACH-000372	4.18745	P12ICHIKAWA	Leukemia	Blood	ALL
ACH-000804	0	NB1	Neuroblastoma	Peripheral Nervous System	NA
ACH-000011	0.15056	253J	Bladder Cancer	Urinary Tract	NA
ACH-000733	0.344828	NCIH1838	Lung Cancer	Lung	NA
ACH-001603	0	NH12	Neuroblastoma	Peripheral Nervous System	NA
ACH-000829	1.93357	HUNS1	Myeloma	Plasma Cell	NA
ACH-000141	0.15056	SNU308	Gallbladder Cancer	Bile Duct	NA
ACH-000810	0.111031	SKMEL30	Skin Cancer	Skin	NA
ACH-001145	0.0565835	OC316	Ovarian Cancer	Ovary	NA
ACH-000717	1.90304	COLO680N	Esophageal Cancer	Esophagus	NA
ACH-000738	0.238787	GB1	Brain Cancer	Central Nervous System	NA
ACH-001843	0.15056	ICC3	Bile Duct Cancer	Bile Duct	NA
ACH-002664	0.0565835	JVE253	Colon/Colorectal Cancer	Colorectal	NA
ACH-000780	0.0565835	NCIH1105	Lung Cancer	Lung	NA
ACH-001548	0	LS	Neuroblastoma	Peripheral Nervous System	NA
ACH-000759	0.0565835	MDAMB175VII	Breast Cancer	Breast	NA
ACH-001555	0.214125	MERO14	Lung Cancer	Lung	NA
ACH-001369	0.298658	OCIC5X	Ovarian Cancer	Ovary	NA
ACH-000969	0	KM12	Colon/Colorectal Cancer	Colorectal	NA
ACH-000873	0.0703893	KYSE270	Esophageal Cancer	Esophagus	NA
ACH-001275	0	SYO1	Sarcoma	Soft Tissue	NA
ACH-000921	1.28688	NCIH157DM	Lung Cancer	Lung	NA
ACH-001373	0.0426443	OV17R	Ovarian Cancer	Ovary	NA
ACH-002800	2.01078	NCCMPNST2C1	Unknown	Peripheral Nervous System	NA
ACH-001022	0	CBAGPN	Bone Cancer	Bone	NA
ACH-000082	0.0703893	G292CLONEA141B1	Bone Cancer	Bone	NA
ACH-000488	0.189034	TE11	Esophageal Cancer	Esophagus	NA
ACH-000790	0.0426443	SHP77	Lung Cancer	Lung	NA
ACH-000172	1.18903	TM87	Rhabdoid	Soft Tissue	NA
ACH-000647	0.799087	TE1	Esophageal Cancer	Esophagus	NA
ACH-000602	0.970854	M07E	Leukemia	Blood	AML
ACH-000156	3.89336	MHHCALL4	Leukemia	Blood	ALL
ACH-002001	0.695994	A375SKINCJ1	Skin Cancer	Skin	NA
ACH-000315	3.58856	KARPAS422	Lymphoma	Lymphocyte	NA
ACH-002446	0	CCLFUPGI0005T	Gastric Cancer	Gastric	NA
ACH-000201	0	A204	Rhabdoid	Soft Tissue	NA
ACH-000435	0.201634	EFE184	Endometrial/Uterine Cancer	Uterus	NA
ACH-000965	0	RL952	Endometrial/Uterine Cancer	Uterus	NA
ACH-001550	1.41143	MCC13	Skin Cancer	Skin	NA
ACH-002026	0.31034	HHUA	Endometrial/Uterine Cancer	Uterus	NA
ACH-000883	1.78241	SW1783	Brain Cancer	Central Nervous System	NA
ACH-000482	0.137504	RERFLCKJ	Lung Cancer	Lung	NA
ACH-000450	0.0565835	MELHO	Skin Cancer	Skin	NA
ACH-002672	0.0840643	MAPACHS77	Pancreatic Cancer	Pancreas	NA
ACH-000835	0.807355	GCT	Sarcoma	Soft Tissue	NA
ACH-001802	0.0426443	LPS853	Liposarcoma	Soft Tissue	NA
ACH-000629	0.275007	IOMMLEE	Brain Cancer	Central Nervous System	NA
ACH-000715	0.454176	SNU1214	Head and Neck Cancer	Upper Aerodigestive	NA
ACH-000870	0.0840643	NCIH1930	Lung Cancer	Lung	NA
ACH-000874	0.963474	RS411	Leukemia	Blood	ALL
ACH-000910	0	MDAMB453	Breast Cancer	Breast	NA
ACH-000779	0.111031	PC9	Lung Cancer	Lung	NA
ACH-000140	0.356144	PFEIFFER	Lymphoma	Lymphocyte	NA
ACH-001196	0.0285692	SMSCTR	Sarcoma	Soft Tissue	NA
ACH-001484	3.68032	CI	Leukemia	Blood	CLL
ACH-000693	0.0285692	KYSE180	Esophageal Cancer	Esophagus	NA
ACH-000811	0.344828	SKOV3	Ovarian Cancer	Ovary	NA
ACH-000101	4.53854	KE37	Leukemia	Blood	AML
ACH-000423	0.0703893	SKMEL3	Skin Cancer	Skin	NA
ACH-000290	0.0426443	NCIH209	Lung Cancer	Lung	NA
ACH-000492	4.94439	MUTZ5	Leukemia	Blood	ALL
ACH-001519	0.0285692	HEMCSS	Bone Cancer	Bone	NA
ACH-000110	0.226509	NCCSTCK140	Gastric Cancer	Gastric	NA
ACH-001497	0.0285692	ESO51	Esophageal Cancer	Esophagus	NA
ACH-000102	0.575312	GMS10	Brain Cancer	Central Nervous System	NA
ACH-000817	3.28392	RPMI8226	Myeloma	Plasma Cell	NA
ACH-001556	0.0426443	MERO25	Lung Cancer	Lung	NA
ACH-000964	0.871844	MOLT3	Leukemia	Blood	ALL
ACH-000378	0.411426	NCIH647	Lung Cancer	Lung	NA
ACH-000913	0.0143553	ESS1	Endometrial/Uterine Cancer	Uterus	NA
ACH-000575	0.226509	HCC364	Lung Cancer	Lung	NA
ACH-000634	0.632268	LN340	Brain Cancer	Central Nervous System	NA
ACH-001322	0.137504	CME1	Sarcoma	Soft Tissue	NA
ACH-000767	0.641546	NCIH526	Lung Cancer	Lung	NA
ACH-001642	1.95977	SCC3	Lymphoma	Lymphocyte	NA
ACH-001552	0.0565835	MCC26	Skin Cancer	Skin	NA
ACH-000451	0.356144	NCIH2085	Lung Cancer	Lung	NA
ACH-000879	0.0285692	MFE296	Endometrial/Uterine Cancer	Uterus	NA
ACH-001842	0.0703893	ICC2	Bile Duct Cancer	Bile Duct	NA
ACH-001032	0.0143553	CHLA32	Bone Cancer	Bone	NA
ACH-000982	0.0703893	GP2D	Colon/Colorectal Cancer	Colorectal	NA
ACH-001636	1.5509	RAMOS	Lymphoma	Lymphocyte	NA
ACH-000189	0.678072	RCC10RGB	Kidney Cancer	Kidney	NA
ACH-000454	0.0426443	HCC95	Lung Cancer	Lung	NA
ACH-000131	0.0840643	HS229T	Non-Cancerous	Fibroblast	NA
ACH-000660	0.298658	SUDHL5	Lymphoma	Lymphocyte	NA
ACH-001197	1.09761	SMZ1	Lymphoma	Lymphocyte	NA
ACH-000915	0.0840643	IPC298	Skin Cancer	Skin	NA
ACH-000480	0.0565835	HUH7	Liver Cancer	Liver	NA
ACH-000745	0.485427	MOLP8	Myeloma	Plasma Cell	NA
ACH-000161	0.0285692	CORL105	Lung Cancer	Lung	NA
ACH-000395	0	NCIH520	Lung Cancer	Lung	NA
ACH-001459	0	C80	Colon/Colorectal Cancer	Colorectal	NA
ACH-000916	0.516015	NCIH1573	Lung Cancer	Lung	NA
ACH-001609	1.88362	NP3	Brain Cancer	Central Nervous System	NA
ACH-001960	0	CCSW1	Bile Duct Cancer	Bile Duct	NA
ACH-001856	1.23879	RBE	Bile Duct Cancer	Bile Duct	NA
ACH-000295	0.575312	EM2	Leukemia	Blood	CML
ACH-001485	3.58135	CII	Leukemia	Blood	CLL
ACH-000292	0.0143553	NCIH841	Lung Cancer	Lung	NA
ACH-000137	1.46989	8MGBA	Brain Cancer	Central Nervous System	NA
ACH-000308	0.226509	EFO21	Ovarian Cancer	Ovary	NA
ACH-000445	1.88753	KNS60	Brain Cancer	Central Nervous System	NA
ACH-001229	0.367371	UPCISCC154	Head and Neck Cancer	Upper Aerodigestive	NA
ACH-000144	0	RERFGC1B	Gastric Cancer	Gastric	NA
ACH-000837	0.713696	NCIH322	Lung Cancer	Lung	NA
ACH-000048	0	TOV112D	Ovarian Cancer	Ovary	NA
ACH-000463	0.0143553	NCIH460	Lung Cancer	Lung	NA
ACH-000881	0	MELJUSO	Skin Cancer	Skin	NA
ACH-000388	5.64501	NUDHL1	Lymphoma	Lymphocyte	NA
ACH-001992	0.333424	ONE58	Lung Cancer	Lung	NA
ACH-000147	0.0840643	T47D	Breast Cancer	Breast	NA
ACH-000930	0.0426443	HCC1569	Breast Cancer	Breast	NA
ACH-000899	0.389567	WM88	Skin Cancer	Skin	NA
ACH-000366	0	SKNDZ	Neuroblastoma	Peripheral Nervous System	NA
ACH-001526	0	HUO9	Bone Cancer	Bone	NA
ACH-000064	0.0143553	SALE	Non-Cancerous	Lung	NA
ACH-001329	0.0840643	ANGMCSS	Brain Cancer	Central Nervous System	NA
ACH-000418	1.03562	SW1353	Bone Cancer	Bone	NA
ACH-001280	0.124328	SCS214	Sarcoma	Soft Tissue	NA
ACH-000861	1.30451	HOP62	Lung Cancer	Lung	NA
ACH-000692	0.895303	SNU899	Head and Neck Cancer	Upper Aerodigestive	NA
ACH-000107	0.516015	CAPAN2	Pancreatic Cancer	Pancreas	NA
ACH-000133	0.0703893	HS729	Unknown	Soft Tissue	NA
ACH-000306	0.0840643	HS688AT	Non-Cancerous	Fibroblast	NA
ACH-001530	0	JEG3	Endometrial/Uterine Cancer	Uterus	NA
ACH-000651	0.575312	SW620	Colon/Colorectal Cancer	Colorectal	NA
ACH-000563	1.52607	EBC1	Lung Cancer	Lung	NA
ACH-000058	0.516015	ML1	Thyroid Cancer	Thyroid	NA
ACH-000345	0.15056	KPNRTBM1	Neuroblastoma	Peripheral Nervous System	NA
ACH-000316	2.79286	SNU886	Liver Cancer	Liver	NA
ACH-000884	0.411426	MDAMB435S	Skin Cancer	Skin	NA
ACH-000289	0.0143553	SNU466	Brain Cancer	Central Nervous System	NA
ACH-001451	0.0285692	BOKU	Cervical Cancer	Cervix	NA
ACH-000355	0.0285692	NCIH82	Lung Cancer	Lung	NA
ACH-002926	0	UPMD1	Unknown	Unknown	NA
ACH-000962	0.378512	OC314	Ovarian Cancer	Ovary	NA
ACH-000473	0.176323	RT112	Bladder Cancer	Urinary Tract	NA
ACH-000192	0	MFE280	Endometrial/Uterine Cancer	Uterus	NA
ACH-001624	0.722466	ONDA9	Brain Cancer	Central Nervous System	NA
ACH-001807	0.111031	LPS067	Liposarcoma	Soft Tissue	NA
ACH-002466	0.263034	RPE1SS111	Non-Cancerous	Eye	NA
ACH-001344	0.0426443	GIMEN	Neuroblastoma	Peripheral Nervous System	NA
ACH-000757	0.0565835	A427	Lung Cancer	Lung	NA
ACH-000054	1	HT1080	Sarcoma	Soft Tissue	NA
ACH-001318	0.0143553	PLCPRF5	Liver Cancer	Liver	NA
ACH-000601	0.201634	MIAPACA2	Pancreatic Cancer	Pancreas	NA
ACH-000635	0.0426443	SNU119	Ovarian Cancer	Ovary	NA
ACH-001857	0.201634	SG231	Bile Duct Cancer	Bile Duct	NA
ACH-000966	0	IGROV1	Ovarian Cancer	Ovary	NA
ACH-000630	0.659925	YD8	Head and Neck Cancer	Upper Aerodigestive	NA
ACH-000225	0.111031	ECC12	Gastric Cancer	Gastric	NA
ACH-000657	0.0143553	A2780	Ovarian Cancer	Ovary	NA
ACH-000624	0.176323	HCC1806	Breast Cancer	Breast	NA
ACH-000699	0.286881	HCC1395	Breast Cancer	Breast	NA
ACH-000923	0.0976108	BCP1	Lymphoma	Lymphocyte	NA
ACH-000687	2.41143	CI1	Lymphoma	Lymphocyte	NA
ACH-000044	1.02148	MDAMB134VI	Breast Cancer	Breast	NA
ACH-000740	1.12433	A253	Head and Neck Cancer	Upper Aerodigestive	NA
ACH-000447	0.201634	NCIH2228	Lung Cancer	Lung	NA
ACH-001416	0	UMUC9	Bladder Cancer	Urinary Tract	NA
ACH-000319	0.0976108	MPP89	Lung Cancer	Lung	NA
ACH-000198	6.0648	EOL1	Leukemia	Blood	AML
ACH-000280	0.0565835	SNU840	Ovarian Cancer	Ovary	NA
ACH-000104	4.23266	LOUCY	Leukemia	Blood	AML
ACH-001835	0.111031	ICC106	Bile Duct Cancer	Bile Duct	NA
ACH-000892	0.0426443	NCIH1563	Lung Cancer	Lung	NA
ACH-000493	1.32193	SNU423	Liver Cancer	Liver	NA
ACH-000042	0.765535	PANC0203	Pancreatic Cancer	Pancreas	NA
ACH-002045	0.0703893	HO1U1	Head and Neck Cancer	Upper Aerodigestive	NA
ACH-000221	0.0143553	SNU398	Liver Cancer	Liver	NA
ACH-000093	0.189034	PANC0504	Pancreatic Cancer	Pancreas	NA
ACH-000477	0.526069	MALME3M	Skin Cancer	Skin	NA
ACH-000746	0.226509	GSS	Gastric Cancer	Gastric	NA
ACH-000356	0.263034	MKN45	Gastric Cancer	Gastric	NA
ACH-000457	0.687061	CAL54	Kidney Cancer	Kidney	NA
ACH-000904	0.137504	NCIH2106	Lung Cancer	Lung	NA
ACH-000244	0.15056	DKMG	Brain Cancer	Central Nervous System	NA
ACH-000610	0.0703893	NCIH2227	Lung Cancer	Lung	NA
ACH-000081	5.93121	GDM1	Leukemia	Blood	AML
ACH-000255	0.298658	LMSU	Gastric Cancer	Gastric	NA
ACH-001038	0.0143553	COGE352	Bone Cancer	Bone	NA
ACH-000352	0.0426443	HCC1428	Breast Cancer	Breast	NA
ACH-002016	0.0840643	MEL290	Eye Cancer	Eye	NA
ACH-000416	0.0285692	NCIH838	Lung Cancer	Lung	NA
ACH-000752	0.0840643	NCIH196	Lung Cancer	Lung	NA
ACH-000862	0.0426443	KMBC2	Bladder Cancer	Urinary Tract	NA
ACH-000236	0.0565835	SW1417	Colon/Colorectal Cancer	Colorectal	NA
ACH-000401	0.0703893	COLO800	Skin Cancer	Skin	NA
ACH-000731	1.49057	HCC2279	Lung Cancer	Lung	NA
ACH-000875	0.214125	NCIH2347	Lung Cancer	Lung	NA
ACH-000626	1.23879	U266B1	Myeloma	Plasma Cell	NA
ACH-000593	0.163499	BC3C	Bladder Cancer	Urinary Tract	NA
ACH-000182	1.774	SNU869	Bile Duct Cancer	Bile Duct	NA
ACH-000442	2.03914	RERFLCSQ1	Lung Cancer	Lung	NA
ACH-000159	1.07039	OSRC2	Kidney Cancer	Kidney	NA
ACH-000907	0.0565835	SNU349	Kidney Cancer	Kidney	NA
ACH-000191	2.95047	BHT101	Thyroid Cancer	Thyroid	NA
ACH-000205	0.378512	PK59	Pancreatic Cancer	Pancreas	NA
ACH-000103	0.367371	CAOV4	Ovarian Cancer	Ovary	NA
ACH-000739	0.0143553	HEPG2	Liver Cancer	Liver	NA
ACH-001558	0.201634	MERO48A	Lung Cancer	Lung	NA
ACH-000206	4.07553	C8166	Lymphoma	Lymphocyte	NA
ACH-000841	0.536053	NCIH2087	Lung Cancer	Lung	NA
ACH-000615	0.0565835	SKMEL28	Skin Cancer	Skin	NA
ACH-001613	5.92362	OCIAML4	Leukemia	Blood	AML
ACH-001608	0.555816	NP2	Brain Cancer	Central Nervous System	NA
ACH-000801	0.0565835	HS936T	Skin Cancer	Skin	NA
ACH-000539	0.226509	HS618T	Non-Cancerous	Fibroblast	NA
ACH-000464	0.678072	CAS1	Brain Cancer	Central Nervous System	NA
ACH-000622	0.0840643	KNS42	Brain Cancer	Central Nervous System	NA
ACH-000452	2.20789	TE8	Esophageal Cancer	Esophagus	NA
ACH-001390	0.124328	SUM149PT	Breast Cancer	Breast	NA
ACH-001401	0	SW13	Adrenal Cancer	Adrenal Cortex	NA
ACH-000365	4.71918	SUDHL4	Lymphoma	Lymphocyte	NA
ACH-001431	0.0565835	TC205	Bone Cancer	Bone	NA
ACH-000475	0.298658	HUH1	Liver Cancer	Liver	NA
ACH-000860	1.25701	NCIH358	Lung Cancer	Lung	NA
ACH-000074	0.879706	KU812	Leukemia	Blood	CML
ACH-000377	0.275007	SNU478	Bile Duct Cancer	Bile Duct	NA
ACH-001562	0.0143553	MERO95	Lung Cancer	Lung	NA
ACH-000259	0.0976108	KELLY	Neuroblastoma	Peripheral Nervous System	NA
ACH-001388	0	SUM102PT	Breast Cancer	Breast	NA
ACH-001410	0	UMUC4	Bladder Cancer	Urinary Tract	NA
ACH-002025	0.0426443	TT1TKB	Colon/Colorectal Cancer	Colorectal	NA
ACH-000720	0.226509	TCCSUP	Bladder Cancer	Urinary Tract	NA
ACH-000095	0	D341	Brain Cancer	Central Nervous System	NA
ACH-001345	0.111031	GP5D	Colon/Colorectal Cancer	Colorectal	NA
ACH-000558	0.163499	A172	Brain Cancer	Central Nervous System	NA
ACH-000664	6.46156	SUDHL1	Lymphoma	Lymphocyte	NA
ACH-000177	0.0143553	NCIH660	Prostate Cancer	Prostate	NA
ACH-000335	0.201634	MSTO211H	Lung Cancer	Lung	NA
ACH-000940	0	AN3CA	Endometrial/Uterine Cancer	Uterus	NA
ACH-000631	0.0285692	KS1	Brain Cancer	Central Nervous System	NA
ACH-000207	0.111031	DETROIT562	Head and Neck Cancer	Upper Aerodigestive	NA
ACH-000764	0.475085	SH10TC	Gastric Cancer	Gastric	NA
ACH-000995	0.454176	JURKAT	Leukemia	Blood	ALL
ACH-000373	3.33914	SKM1	Leukemia	Blood	AML
ACH-000953	0.124328	SUPT1	Leukemia	Blood	ALL
ACH-000709	0.669027	KMRC2	Kidney Cancer	Kidney	NA
ACH-000846	0.15056	FADU	Head and Neck Cancer	Upper Aerodigestive	NA
ACH-001702	0.367371	VAESBJ	Sarcoma	Soft Tissue	NA
ACH-000333	0.0565835	JHOM2B	Ovarian Cancer	Ovary	NA
ACH-002059	0.0840643	P30OHK	Leukemia	Blood	ALL
ACH-000929	0.31034	NCIH2110	Lung Cancer	Lung	NA
ACH-001395	0	SUM44PE	Breast Cancer	Breast	NA
ACH-000948	0.344828	2313287	Gastric Cancer	Gastric	NA
ACH-002015	0.0976108	MEL285	Eye Cancer	Eye	NA
ACH-000981	0.111031	DND41	Leukemia	Blood	ALL
ACH-000617	0.163499	OVCAR4	Ovarian Cancer	Ovary	NA
ACH-000311	0.0426443	NCIH2122	Lung Cancer	Lung	NA
ACH-001210	0.0143553	TTC1240	Rhabdoid	Soft Tissue	NA
ACH-001834	1.52105	ICC10	Bile Duct Cancer	Bile Duct	NA
ACH-000390	0.189034	LUDLU1	Lung Cancer	Lung	NA
ACH-000468	0.773996	PK45H	Pancreatic Cancer	Pancreas	NA
ACH-001061	0.298658	DLD1	Colon/Colorectal Cancer	Colorectal	NA
ACH-000077	3.37434	MJ	Lymphoma	Lymphocyte	NA
ACH-000456	0.536053	BCPAP	Thyroid Cancer	Thyroid	NA
ACH-000496	0.400538	NCIH1792	Lung Cancer	Lung	NA
ACH-002512	0.124328	MM160113	Skin Cancer	Skin	NA
ACH-000062	1.77821	RERFLCMS	Lung Cancer	Lung	NA
ACH-002464	0.555816	RPE1SS6	Non-Cancerous	Eye	NA
ACH-000088	0.226509	HS172T	Non-Cancerous	Fibroblast	NA
ACH-000536	0.0143553	BT20	Breast Cancer	Breast	NA
ACH-000071	0.0143553	HS706T	Non-Cancerous	Fibroblast	NA
ACH-002004	0.0143553	UACC62SKINCJ1	Skin Cancer	Skin	NA
ACH-000878	0.333424	HCC15	Lung Cancer	Lung	NA
ACH-001380	0.250962	PACADD165	Pancreatic Cancer	Pancreas	NA
ACH-002061	1.02857	P2URK562	Leukemia	Blood	CML
ACH-000385	2.73118	SKRC20	Kidney Cancer	Kidney	NA
ACH-000412	1.79077	SNU1197	Colon/Colorectal Cancer	Colorectal	NA
ACH-000427	0.111031	NCIN87	Gastric Cancer	Gastric	NA
ACH-000938	0.454176	NALM6	Leukemia	Blood	ALL
ACH-000462	1.59932	NALM1	Leukemia	Blood	CML
ACH-000939	0.275007	SKUT1	Sarcoma	Soft Tissue	NA
ACH-000325	0.286881	SNU620	Gastric Cancer	Gastric	NA
ACH-000515	0	HCC33	Lung Cancer	Lung	NA
ACH-001033	0.0426443	CHLA57	Unknown	Central Nervous System	NA
ACH-000919	0.0703893	IM95	Gastric Cancer	Gastric	NA
ACH-000863	0.0565835	DBTRG05MG	Brain Cancer	Central Nervous System	NA
ACH-000642	0.263034	HMEL	Non-Cancerous	Breast	NA
ACH-000581	0	SNU16	Gastric Cancer	Gastric	NA
ACH-001050	0	CW9019	Sarcoma	Soft Tissue	NA
ACH-001818	0	C396	Bone Cancer	Bone	NA
ACH-001384	0.0285692	RO82W1	Thyroid Cancer	Thyroid	NA
ACH-000797	0.0426443	HLFA	Non-Cancerous	Fibroblast	NA
ACH-000220	4.12184	MINO	Lymphoma	Lymphocyte	NA
ACH-001533	2.852	KARPAS1718	Lymphoma	Lymphocyte	NA
ACH-000827	0.0840643	WM793	Skin Cancer	Skin	NA
ACH-000961	0	ISHIKAWAHERAKLIO02ER	Endometrial/Uterine Cancer	Uterus	NA
ACH-000778	0.895303	HSC3	Head and Neck Cancer	Upper Aerodigestive	NA
ACH-000825	1.43829	HOP92	Lung Cancer	Lung	NA
ACH-000743	0.124328	CORL95	Lung Cancer	Lung	NA
ACH-000190	0.422233	HDMYZ	Unknown	Unknown	NA
ACH-001819	0	MFM223	Breast Cancer	Breast	NA
ACH-000157	0.575312	A4FUK	Lymphoma	Lymphocyte	NA
ACH-001786	0	SNU1544	Colon/Colorectal Cancer	Colorectal	NA
ACH-000253	1.32193	COLO201	Colon/Colorectal Cancer	Colorectal	NA
ACH-001376	0.344828	PACADD135	Pancreatic Cancer	Pancreas	NA
ACH-000958	0.0426443	SW48	Colon/Colorectal Cancer	Colorectal	NA
ACH-000228	0.275007	BICR31	Head and Neck Cancer	Upper Aerodigestive	NA
ACH-000266	0.963474	SNU213	Pancreatic Cancer	Pancreas	NA
ACH-001750	0.124328	TTC442	Sarcoma	Soft Tissue	NA
ACH-000174	0.0565835	CAL62	Thyroid Cancer	Thyroid	NA
ACH-000245	1.56071	BL41	Lymphoma	Lymphocyte	NA
ACH-001279	0	SCCOHT1	Ovarian Cancer	Ovary	NA
ACH-000620	0.189034	JHH1	Liver Cancer	Liver	NA
ACH-000813	0.189034	T3M10	Lung Cancer	Lung	NA
ACH-001513	0	HCA1	Cervical Cancer	Cervix	NA
ACH-000168	4.51602	NOMO1	Leukemia	Blood	AML
ACH-000257	0	CORL279	Lung Cancer	Lung	NA
ACH-000211	0.831877	DAOY	Brain Cancer	Central Nervous System	NA
ACH-000283	0.0703893	A1207	Brain Cancer	Central Nervous System	NA
ACH-002041	1.42761	HOTHC	Thyroid Cancer	Thyroid	NA
ACH-000987	0.0976108	MEWO	Skin Cancer	Skin	NA
ACH-000682	0.632268	SNU1066	Head and Neck Cancer	Upper Aerodigestive	NA
ACH-000073	2.10098	GRANTA519	Lymphoma	Lymphocyte	NA
ACH-000212	0.0285692	CAL120	Breast Cancer	Breast	NA
ACH-000096	0.0703893	G401	Rhabdoid	Kidney	NA
ACH-001433	0.0143553	CCLFPEDS0008T	Sarcoma	Soft Tissue	NA
ACH-000063	0.0285692	HS616T	Non-Cancerous	Fibroblast	NA
ACH-001999	0.704872	9505BIK	Pancreatic Cancer	Pancreas	NA
ACH-000776	0.124328	ONS76	Brain Cancer	Central Nervous System	NA
ACH-000521	0.0143553	NCIH2030	Lung Cancer	Lung	NA
ACH-000025	0.704872	CH157MN	Brain Cancer	Central Nervous System	NA
ACH-000591	0.137504	LN235	Brain Cancer	Central Nervous System	NA
ACH-001716	0	GOTO	Neuroblastoma	Peripheral Nervous System	NA
ACH-000833	0.124328	RH30	Sarcoma	Soft Tissue	NA
ACH-001628	0.226509	PEA1	Ovarian Cancer	Ovary	NA
ACH-000398	3.95884	RI1	Lymphoma	Lymphocyte	NA
ACH-000274	0.0143553	HS852T	Skin Cancer	Skin	NA
ACH-001370	0.464668	OCIP5X	Ovarian Cancer	Ovary	NA
ACH-000029	0.831877	HCC827GR5	Lung Cancer	Lung	NA
ACH-001849	0.0285692	ICC9	Bile Duct Cancer	Bile Duct	NA
ACH-000644	0.124328	COLO829	Skin Cancer	Skin	NA
ACH-001422	0.0285692	WPE1NA22	Prostate Cancer	Prostate	NA
ACH-000588	0.0976108	KMS26	Myeloma	Plasma Cell	NA
ACH-000849	0.176323	MDAMB468	Breast Cancer	Breast	NA
ACH-000219	0.189034	A375	Skin Cancer	Skin	NA
ACH-000150	0.0285692	HCC2935	Lung Cancer	Lung	NA
ACH-001845	0.137504	ICC5	Bile Duct Cancer	Bile Duct	NA
ACH-000384	0.189034	SW780	Bladder Cancer	Urinary Tract	NA
ACH-001053	0	D425	Brain Cancer	Central Nervous System	NA
ACH-001274	1.4957	SW982	Sarcoma	Soft Tissue	NA
ACH-000091	0.659925	OV56	Ovarian Cancer	Ovary	NA
ACH-002014	0	MEL270	Eye Cancer	Eye	NA
ACH-001634	4.0781	PGA1	Leukemia	Blood	CLL
ACH-000495	0.286881	TUHR4TKB	Kidney Cancer	Kidney	NA
ACH-000911	0.124328	NUGC3	Gastric Cancer	Gastric	NA
ACH-000013	0.0703893	ONCODG1	Ovarian Cancer	Ovary	NA
ACH-000777	0.275007	KYSE30	Esophageal Cancer	Esophagus	NA
ACH-001765	0	RH4	Sarcoma	Soft Tissue	NA
ACH-000312	0.15056	SKNBE2	Neuroblastoma	Peripheral Nervous System	NA
ACH-000085	0.454176	T3M4	Pancreatic Cancer	Pancreas	NA
ACH-000436	4.50462	OCIMY7	Myeloma	Plasma Cell	NA
ACH-000869	0.0703893	NCIH1568	Lung Cancer	Lung	NA
ACH-000267	3.35473	HDLM2	Lymphoma	Lymphocyte	NA
ACH-000489	0.15056	SW1116	Colon/Colorectal Cancer	Colorectal	NA
ACH-000431	0.275007	NCIH1694	Lung Cancer	Lung	NA
ACH-000152	0.0703893	M059K	Brain Cancer	Central Nervous System	NA
ACH-000909	0	JHUEM2	Endometrial/Uterine Cancer	Uterus	NA
ACH-000534	4.38128	WSUDLCL2	Lymphoma	Lymphocyte	NA
ACH-000582	0.0840643	COLO741	Skin Cancer	Skin	NA
ACH-000460	0.176323	SNU8	Ovarian Cancer	Ovary	NA
ACH-000443	0.0840643	OVKATE	Ovarian Cancer	Ovary	NA
ACH-001570	0.0426443	MM426	Skin Cancer	Skin	NA
ACH-000986	0.0703893	HT115	Colon/Colorectal Cancer	Colorectal	NA
ACH-001335	0	C4II	Cervical Cancer	Cervix	NA
ACH-000023	0.0143553	PATU8988T	Pancreatic Cancer	Pancreas	NA
ACH-002062	0.189034	SLVL	Lymphoma	Lymphocyte	NA
ACH-002462	0.124328	RPE1SS48	Non-Cancerous	Eye	NA
ACH-000151	0.263034	JM1	Leukemia	Blood	ALL
ACH-001277	0	YAMATO	Sarcoma	Soft Tissue	NA
ACH-000607	0.0976108	KYM1	Rhabdoid	Soft Tissue	NA
ACH-002647	0.422233	CCC5	Gastric Cancer	Gastric	NA
ACH-000703	0	DMS79	Lung Cancer	Lung	NA
ACH-001211	0.378512	TTC549	Rhabdoid	Soft Tissue	NA
ACH-001511	0.111031	H413	Head and Neck Cancer	Upper Aerodigestive	NA
ACH-000113	5.749	OCIAML2	Leukemia	Blood	AML
ACH-000337	0.124328	NCIH3122	Lung Cancer	Lung	NA
ACH-000598	3.84097	KMS21BM	Myeloma	Plasma Cell	NA
ACH-000057	0.807355	OPM1	Myeloma	Plasma Cell	NA
ACH-000281	0.275007	KP2	Pancreatic Cancer	Pancreas	NA
ACH-000321	1.84398	MOLM6	Leukemia	Blood	CML
ACH-000985	0.15056	LS411N	Colon/Colorectal Cancer	Colorectal	NA
ACH-000444	0.0703893	LU99	Lung Cancer	Lung	NA
ACH-000347	0.0703893	QGP1	Pancreatic Cancer	Pancreas	NA
ACH-001399	0.0143553	SW626	Colon/Colorectal Cancer	Colorectal	NA
ACH-001097	6.2854	KARPAS384	Lymphoma	Lymphocyte	NA
ACH-000127	0.137504	SLR20	Bladder Cancer	Urinary Tract	NA
ACH-001961	1.37295	GB2	Gallbladder Cancer	Bile Duct	NA
ACH-001796	0.0840643	95T1000	Liposarcoma	Soft Tissue	NA
ACH-000307	1.39506	PK1	Pancreatic Cancer	Pancreas	NA
ACH-001030	0	CHLA218	Bone Cancer	Bone	NA
ACH-000595	0.847997	LN229	Brain Cancer	Central Nervous System	NA
ACH-001540	0.137504	KMLS1	Liposarcoma	Soft Tissue	NA
ACH-000298	0.0565835	NCIH2029	Lung Cancer	Lung	NA
ACH-000771	0.226509	BICR56	Head and Neck Cancer	Upper Aerodigestive	NA
ACH-000500	0.641546	SNU46	Head and Neck Cancer	Upper Aerodigestive	NA
ACH-000353	0.0143553	TE15	Esophageal Cancer	Esophagus	NA
ACH-000363	1.15704	SKMM2	Myeloma	Plasma Cell	NA
ACH-000350	0.0143553	COLO678	Colon/Colorectal Cancer	Colorectal	NA
ACH-000053	3.89239	KARPAS299	Lymphoma	Lymphocyte	NA
ACH-001543	0.356144	KOSC2	Head and Neck Cancer	Upper Aerodigestive	NA
ACH-000246	0.847997	SLR23	Kidney Cancer	Kidney	NA
ACH-000663	0.356144	OVTOKO	Ovarian Cancer	Ovary	NA
ACH-000346	3.59813	JVM3	Leukemia	Blood	ALL
ACH-000970	0.15056	SNUC5	Colon/Colorectal Cancer	Colorectal	NA
ACH-001333	0.0840643	C33A	Cervical Cancer	Cervix	NA
ACH-000794	0.163499	BICR22	Head and Neck Cancer	Upper Aerodigestive	NA
ACH-000039	0	SKNMC	Bone Cancer	Bone	NA
ACH-000471	0.238787	LI7	Liver Cancer	Liver	NA
ACH-000850	0	HS698T	Non-Cancerous	Fibroblast	NA
ACH-000291	0.0703893	OV90	Ovarian Cancer	Ovary	NA
ACH-001453	0.238787	BPH1	Prostate Cancer	Prostate	NA
ACH-001458	0	C75	Colon/Colorectal Cancer	Colorectal	NA
ACH-000886	2.46467	NCIH2009	Lung Cancer	Lung	NA
ACH-000888	0.286881	NCIH1793	Lung Cancer	Lung	NA
ACH-000659	0.321928	SCLC21H	Lung Cancer	Lung	NA
ACH-000030	0.163499	PC14	Lung Cancer	Lung	NA
ACH-001201	0	SUMB002	Brain Cancer	Central Nervous System	NA
ACH-000271	3.47119	SUDHL10	Lymphoma	Lymphocyte	NA
ACH-000549	0.111031	SNU1076	Head and Neck Cancer	Upper Aerodigestive	NA
ACH-000555	0.333424	A498	Kidney Cancer	Kidney	NA
ACH-000478	1.41143	SNU387	Liver Cancer	Liver	NA
ACH-000775	1.59932	NCIH727	Lung Cancer	Lung	NA
ACH-000038	5.04221	EHEB	Lymphoma	Lymphocyte	NA
ACH-001109	0	KPMRTRY	Rhabdoid	Soft Tissue	NA
ACH-001442	0.286881	A388	Skin Cancer	Epidermoid Carcinoma	NA
ACH-000559	0	NCIH1836	Lung Cancer	Lung	NA
ACH-000510	0.0565835	NCIH1299	Lung Cancer	Lung	NA
ACH-002065	0.111031	HSPSS	Sarcoma	Central Nervous System	NA
ACH-000676	0.111031	LN464	Brain Cancer	Central Nervous System	NA
ACH-002659	0.0143553	JVE127	Colon/Colorectal Cancer	Colorectal	NA
ACH-000844	0	DMS454	Lung Cancer	Lung	NA
ACH-000925	0.0565835	DV90	Lung Cancer	Lung	NA
ACH-002465	0.137504	RPE1SS119	Non-Cancerous	Eye	NA
ACH-000272	0.400538	SLR24	Kidney Cancer	Kidney	NA
ACH-001035	0	CHLA99	Bone Cancer	Bone	NA
ACH-000513	0.815575	SNU1272	Kidney Cancer	Kidney	NA
ACH-001059	0.124328	DL	Rhabdoid	Soft Tissue	NA
ACH-000959	0.0976108	SNUC4	Colon/Colorectal Cancer	Colorectal	NA
ACH-000169	0.0143553	RD	Sarcoma	Soft Tissue	NA
ACH-001402	0.454176	SW756	Cervical Cancer	Cervix	NA
ACH-000796	0.238787	MCAS	Ovarian Cancer	Ovary	NA
ACH-000143	0.0285692	HCC2429	Lung Cancer	Lung	NA
ACH-000067	1.21412	HS683	Brain Cancer	Central Nervous System	NA
ACH-000640	0.263034	SKMEL31	Skin Cancer	Skin	NA
ACH-001674	0	TGW	Neuroblastoma	Peripheral Nervous System	NA
ACH-001698	0.0426443	UPCISCC116	Head and Neck Cancer	Upper Aerodigestive	NA
ACH-002002	0.659925	A375SKINCJ2	Skin Cancer	Skin	NA
ACH-002011	0	MP46	Eye Cancer	Eye	NA
ACH-000967	0.124328	SNUC2A	Colon/Colorectal Cancer	Colorectal	NA
ACH-000469	0.31034	YH13	Brain Cancer	Central Nervous System	NA
ACH-001353	0.545968	JOPACA1	Pancreatic Cancer	Pancreas	NA
ACH-001574	4.38267	MOLM14	Leukemia	Blood	AML
ACH-000097	0.0426443	ZR751	Breast Cancer	Breast	NA
ACH-000256	0.214125	COV318	Ovarian Cancer	Ovary	NA
ACH-000977	0.163499	LNCAPCLONEFGC	Prostate Cancer	Prostate	NA
ACH-000972	0.124328	HEC151	Endometrial/Uterine Cancer	Uterus	NA
ACH-001367	0	NMB	Neuroblastoma	Peripheral Nervous System	NA
ACH-000382	0	CORL24	Lung Cancer	Lung	NA
ACH-000579	0.111031	UACC257	Skin Cancer	Skin	NA
ACH-001532	0	JMURTK2	Rhabdoid	Kidney	NA
ACH-000695	0	CORL47	Lung Cancer	Lung	NA
ACH-001795	0.594549	94T778	Liposarcoma	Soft Tissue	NA
ACH-001510	0.286881	H376	Head and Neck Cancer	Upper Aerodigestive	NA
ACH-000502	0.526069	TCCPAN2	Pancreatic Cancer	Pancreas	NA
ACH-000183	0.0703893	L363	Myeloma	Plasma Cell	NA
ACH-000408	0.226509	TE5	Esophageal Cancer	Esophagus	NA
ACH-001496	0.15056	ESO26	Esophageal Cancer	Esophagus	NA
ACH-000788	0.124328	A2058	Skin Cancer	Skin	NA
ACH-001622	1.0635	ONDA7	Brain Cancer	Central Nervous System	NA
ACH-000466	0.0976108	SNU216	Gastric Cancer	Gastric	NA
ACH-001560	0	MERO83	Lung Cancer	Lung	NA
ACH-000005	2.22651	HEL9217	Leukemia	Blood	AML
ACH-001687	0.0143553	UMRC3	Kidney Cancer	Kidney	NA
ACH-001151	1.69153	OVCAR5	Ovarian Cancer	Ovary	NA
ACH-000701	0.0565835	RMUGS	Ovarian Cancer	Ovary	NA
ACH-000542	0.214125	HEYA8	Ovarian Cancer	Ovary	NA
ACH-000126	0.918386	KG1C	Brain Cancer	Central Nervous System	NA
ACH-001685	0.15056	UHO1	Lymphoma	Lymphocyte	NA
ACH-000933	0	SNU324	Pancreatic Cancer	Pancreas	NA
ACH-000068	2.52105	REC1	Lymphoma	Lymphocyte	NA
ACH-000015	0	NCIH1581	Lung Cancer	Lung	NA
ACH-001111	4.83036	L82	Lymphoma	Lymphocyte	NA
ACH-000487	1.08406	F36P	Leukemia	Blood	AML
ACH-000122	5.58105	SUPT11	Leukemia	Blood	ALL
ACH-000288	0.0285692	BT549	Breast Cancer	Breast	NA
ACH-001820	0	COLO824	Breast Cancer	Breast	NA
ACH-000782	2.82171	SEM	Leukemia	Blood	ALL
ACH-001632	0.0426443	PEO4	Ovarian Cancer	Ovary	NA
ACH-000357	2.75702	JEKO1	Lymphoma	Lymphocyte	NA
ACH-000079	0.0703893	TE125T	Non-Cancerous	Fibroblast	NA
ACH-001031	0	CHLA266	Rhabdoid	Soft Tissue	NA
ACH-001048	0.124328	COV504	Ovarian Cancer	Ovary	NA
ACH-000453	3.3505	MOLP2	Myeloma	Plasma Cell	NA
ACH-000791	0.0565835	RERFLCAD1	Lung Cancer	Lung	NA
ACH-000567	0.0426443	ST486	Lymphoma	Lymphocyte	NA
ACH-001391	0.0565835	SUM159PT	Breast Cancer	Breast	NA
ACH-001075	0.176323	NCIH292	Lung Cancer	Lung	NA
ACH-000105	3.03738	ALLSIL	Leukemia	Blood	ALL
ACH-000557	5.13134	AML193	Leukemia	Blood	AML
ACH-000175	0.0143553	TE159T	Non-Cancerous	Fibroblast	NA
ACH-001356	0.389567	MB1	Thyroid Cancer	Thyroid	NA
ACH-001844	0	ICC4	Bile Duct Cancer	Bile Duct	NA
ACH-001346	0.0840643	H103	Head and Neck Cancer	Upper Aerodigestive	NA
ACH-000885	0.475085	TOV21G	Ovarian Cancer	Ovary	NA
ACH-000900	0.704872	NCIH23	Lung Cancer	Lung	NA
ACH-000666	0.0285692	NCIH1355	Lung Cancer	Lung	NA
ACH-000217	2.10769	JHH6	Liver Cancer	Liver	NA
ACH-000872	0.286881	HCC515	Lung Cancer	Lung	NA
ACH-001638	0.378512	RCK8	Lymphoma	Lymphocyte	NA
ACH-001228	0.0703893	UPCISCC152	Head and Neck Cancer	Upper Aerodigestive	NA
ACH-000181	0.0426443	SCC9	Head and Neck Cancer	Upper Aerodigestive	NA
ACH-000115	0.15056	VCAP	Prostate Cancer	Prostate	NA
ACH-000130	1.07724	NALM19	Leukemia	Blood	ALL
ACH-000121	0.863938	NCIH2405	Lung Cancer	Lung	NA
ACH-001711	0.0703893	PFSK1	Brain Cancer	Central Nervous System	NA
ACH-000934	0.333424	MDAMB361	Breast Cancer	Breast	NA
ACH-000996	0.286881	HEC251	Endometrial/Uterine Cancer	Uterus	NA
ACH-001529	0	JAR	Endometrial/Uterine Cancer	Uterus	NA
ACH-001743	0.15056	RC2	Sarcoma	Soft Tissue	NA
ACH-000320	3.24641	PSN1	Pancreatic Cancer	Pancreas	NA
ACH-000505	1.83188	RKN	Sarcoma	Soft Tissue	NA
ACH-000781	0.0285692	NCIH2023	Lung Cancer	Lung	NA
ACH-000059	1.926	SUPB15	Leukemia	Blood	ALL
ACH-000920	3.69488	CMLT1	Leukemia	Blood	CML
ACH-000294	1.95606	NB4	Leukemia	Blood	AML
ACH-000422	0.0565835	SNU475	Liver Cancer	Liver	NA
ACH-000200	0.321928	NMCG1	Brain Cancer	Central Nervous System	NA
ACH-000046	0.333424	ACHN	Kidney Cancer	Kidney	NA
ACH-000968	0.0285692	COLO792	Skin Cancer	Skin	NA
ACH-000830	0.333424	NCIH1436	Lung Cancer	Lung	NA
ACH-000114	1.50589	SU8686	Pancreatic Cancer	Pancreas	NA
ACH-000402	1.11103	BL70	Lymphoma	Lymphocyte	NA
ACH-001578	0	NCCIT	Embryonal Cancer	Embryo	NA
ACH-000036	1.1375	U343	Brain Cancer	Central Nervous System	NA
ACH-000973	0.0976108	639V	Bladder Cancer	Urinary Tract	NA
ACH-001128	0.0703893	MON	Rhabdoid	Soft Tissue	NA
ACH-000750	1.57531	LOXIMVI	Skin Cancer	Skin	NA
ACH-000285	0.879706	TOLEDO	Lymphoma	Lymphocyte	NA
ACH-002669	0.669027	KP363T	Colon/Colorectal Cancer	Colorectal	NA
ACH-001858	0.344828	SSP25	Bile Duct Cancer	Bile Duct	NA
ACH-001997	0.0143553	ECC2	Bile Duct Cancer	Bile Duct	NA
ACH-000052	0.0426443	A673	Bone Cancer	Bone	NA
NA, not applicable; AML, acute myeloid leukemia; ALL, acute lymphoblastic leukemia; CML, chronic myeloid leukemia; CLL, chronic lymphoblastic leukemia; CCLE, Cancer Cell Line Encyclopedia; CYTH4, cytohesin-4.
